# Supplementary material for: Trust in the health care professional and health outcome: A meta-analysis
Source: PubMed Central journal article supplement (PMC5295692; doi:10.1371/journal.pone.0170988), 2017-02-07
Supplement: pone.0170988.s001.pdf [file pone.0170988.s001.pdf]

## Supporting File S1. Search Strategies.

---

**Embase (Elsevier) (Harvard library)**

1692 Records, 21030621

('trust'/exp AND 'doctor patient relation'/exp) OR (trust\* NEAR/2 (patient\* OR physician\* OR doctor\* OR therapist\* OR provider\* OR nurse\*)):ab,ti

---

**PubMed (MEDLINE) (Harvard library)**

2475 Records, 20130621

(exp "Trust"/ and exp "Physician-Patient Relations"/) OR (trust\* adj2 (patient\* OR physician\* OR doctor\* OR therapist\* OR provider\* OR nurse\*)).tw

---

**CINAHL (EBSCO) (Harvard library)**

2218 Records, 20130621

MH ("Professional-Patient Relations+" AND "Trust") OR TI (trust\* N2 (patient\* OR physician\* OR doctor\* OR therapist\* OR provider\* OR nurse\*)) OR AB (trust\* N2 (patient\* OR physician\* OR doctor\* OR therapist\* OR provider\* OR nurse\*))

---

**PsycINFO (EBSCOhost) (Harvard library)**

1509 Records, 20130621

(DE "Trust (Social Behavior)" AND (TI (patient\* OR physician\* OR doctor\* OR therapist\* OR provider\* OR nurse\*) OR AB (patient\* OR physician\* OR doctor\* OR therapist\* OR provider\* OR nurse\*))) OR TI (trust\* N2 (patient\* OR physician\* OR doctor\* OR therapist\* OR provider\* OR nurse\*)) OR AB (trust\* N2 (patient\* OR physician\* OR doctor\* OR therapist\* OR provider\* OR nurse\*))

---
