# Supplementary material for: Trust in the health care professional and health outcome: A meta-analysis
Source: PubMed Central journal article supplement (PMC5295692; doi:10.1371/journal.pone.0170988), 2017-02-07
Supplement: pone.0170988.s002.pdf [file pone.0170988.s002.pdf]

# Supporting File S2. Forest Plots.

## Analysis including all outcomes

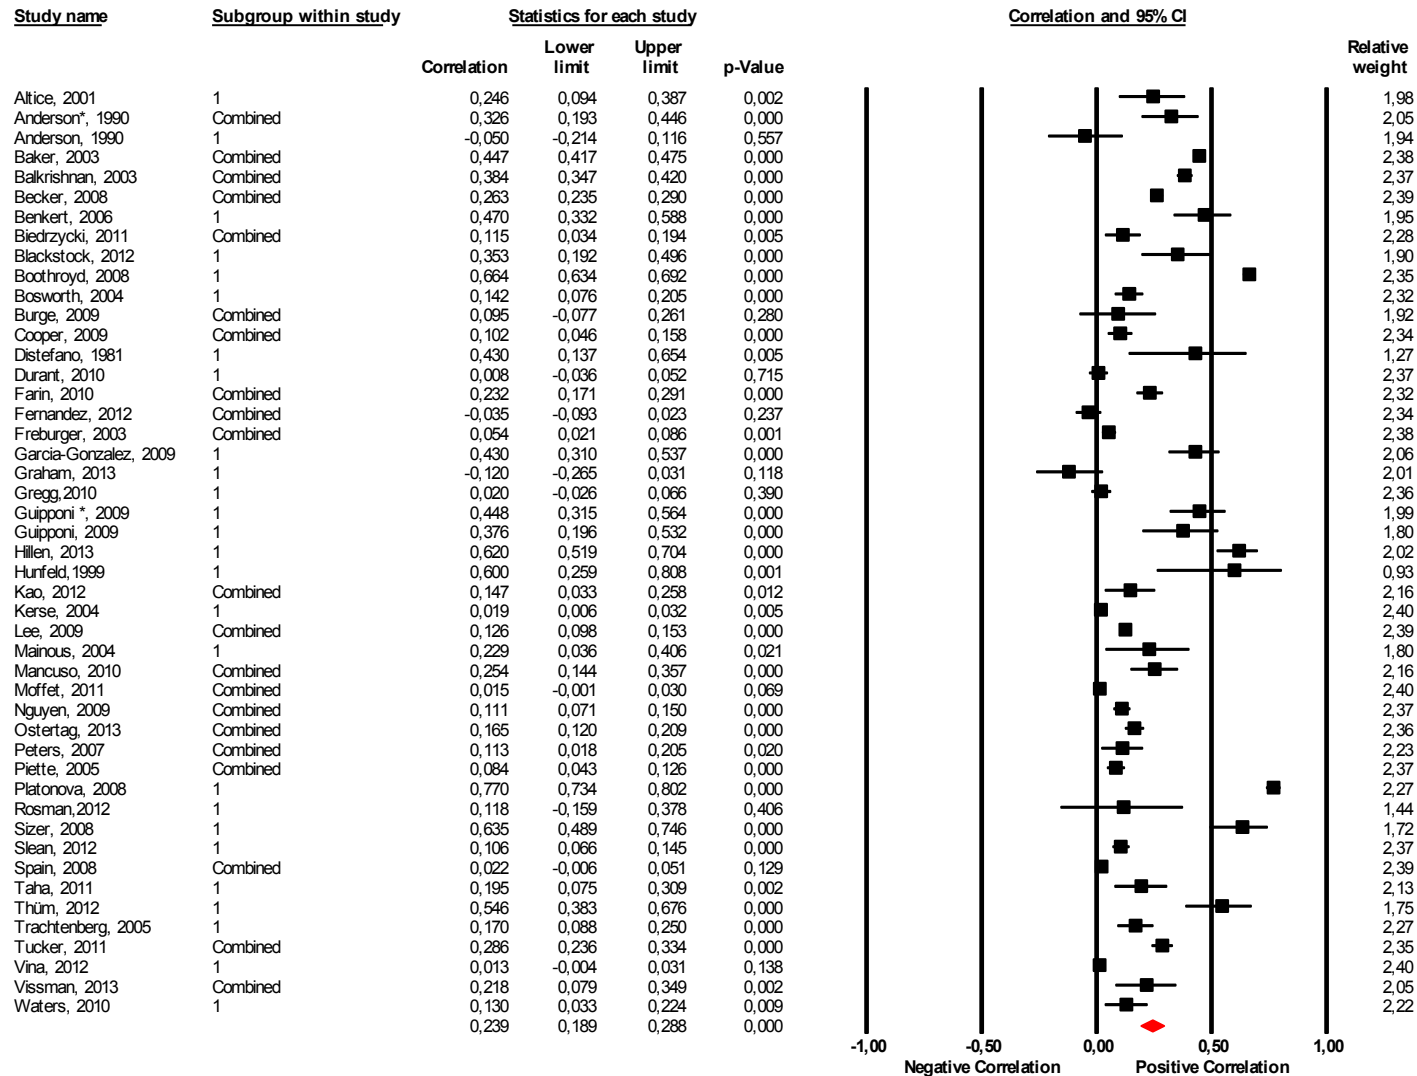

## Data set for Forest plot

| Study name            | Subgroup within study | Correlation | Lower Limit | Upper limit | p-Value |
|-----------------------|-----------------------|-------------|-------------|-------------|---------|
| Altice, 2001          | 1                     | 0,25        | 0,09        | 0,39        | 0,00    |
| Anderson*, 1990       | Combined              | 0,33        | 0,19        | 0,45        | 0,00    |
| Anderson, 1990        | 1                     | -0,05       | -0,21       | 0,12        | 0,56    |
| Baker, 2003           | Combined              | 0,45        | 0,42        | 0,48        | 0,00    |
| Balkrishnan, 2003     | Combined              | 0,38        | 0,35        | 0,42        | 0,00    |
| Becker, 2008          | Combined              | 0,26        | 0,23        | 0,29        | 0,00    |
| Benkert, 2006         | 1                     | 0,47        | 0,33        | 0,59        | 0,00    |
| Biedrzycki, 2011      | Combined              | 0,12        | 0,03        | 0,19        | 0,01    |
| Blackstock, 2012      | 1                     | 0,35        | 0,19        | 0,50        | 0,00    |
| Boothroyd, 2008       | 1                     | 0,66        | 0,63        | 0,69        | 0,00    |
| Bosworth, 2004        | 1                     | 0,14        | 0,08        | 0,21        | 0,00    |
| Burge, 2009           | Combined              | 0,09        | -0,08       | 0,26        | 0,28    |
| Cooper, 2009          | Combined              | 0,10        | 0,05        | 0,16        | 0,00    |
| Distefano, 1981       | 1                     | 0,43        | 0,14        | 0,65        | 0,01    |
| Durant, 2010          | 1                     | 0,01        | -0,04       | 0,05        | 0,71    |
| Farin, 2010           | Combined              | 0,23        | 0,17        | 0,29        | 0,00    |
| Fernandez, 2012       | Combined              | -0,04       | -0,09       | 0,02        | 0,24    |
| Freburger, 2003       | Combined              | 0,05        | 0,02        | 0,09        | 0,00    |
| Garcia-Gonzalez, 2009 | 1                     | 0,43        | 0,31        | 0,54        | 0,00    |
| Graham, 2013          | 1                     | -0,12       | -0,27       | 0,03        | 0,12    |
| Gregg, 2010           | 1                     | 0,02        | -0,03       | 0,07        | 0,39    |
| Guipponi*, 2009       | 1                     | 0,45        | 0,32        | 0,56        | 0,00    |
| Guipponi, 2009        | 1                     | 0,38        | 0,20        | 0,53        | 0,00    |
| Hillen, 2013          | 1                     | 0,62        | 0,52        | 0,70        | 0,00    |
| Hunfeld, 1999         | 1                     | 0,60        | 0,26        | 0,81        | 0,00    |
| Kao, 2012             | Combined              | 0,15        | 0,03        | 0,26        | 0,01    |
| Kerse, 2004           | 1                     | 0,02        | 0,01        | 0,03        | 0,00    |
| Lee, 2009             | Combined              | 0,13        | 0,10        | 0,15        | 0,00    |
| Mainous, 2004         | 1                     | 0,23        | 0,04        | 0,41        | 0,02    |
| Mancuso, 2010         | Combined              | 0,25        | 0,14        | 0,36        | 0,00    |
| Moffet, 2011          | Combined              | 0,01        | 0,00        | 0,03        | 0,07    |
| Nguyen, 2009          | Combined              | 0,11        | 0,07        | 0,15        | 0,00    |
| Ostertag, 2013        | Combined              | 0,17        | 0,12        | 0,21        | 0,00    |
| Peters, 2007          | Combined              | 0,11        | 0,02        | 0,21        | 0,02    |
| Piette, 2005          | Combined              | 0,08        | 0,04        | 0,13        | 0,00    |
| Platonova, 2008       | 1                     | 0,77        | 0,73        | 0,80        | 0,00    |
| Rosman, 2012          | 1                     | 0,12        | -0,16       | 0,38        | 0,41    |
| Sizer, 2008           | 1                     | 0,64        | 0,49        | 0,75        | 0,00    |
| Slean, 2012           | 1                     | 0,11        | 0,07        | 0,15        | 0,00    |
| Spain, 2008           | Combined              | 0,02        | -0,01       | 0,05        | 0,13    |

| Study name         | Subgroup within study | Correlation | Lower limit | Upper limit | p-Value |
|--------------------|-----------------------|-------------|-------------|-------------|---------|
| Thüm, 2012         | 1                     | 0,55        | 0,38        | 0,68        | 0,00    |
| Trachtenberg, 2005 | 1                     | 0,17        | 0,09        | 0,25        | 0,00    |
| Tucker, 2011       | Combined              | 0,29        | 0,24        | 0,33        | 0,00    |
| Vina, 2012         | 1                     | 0,01        | 0,00        | 0,03        | 0,14    |
| Vissman, 2013      | Combined              | 0,22        | 0,08        | 0,35        | 0,00    |
| Waters, 2010       | 1                     | 0,13        | 0,03        | 0,22        | 0,01    |
|                    |                       | 0,24        | 0,19        | 0,29        | 0,00    |

Note. \*Described as a second independent study population in article, therefore separately included in analysis.

## Analysis including objective outcomes

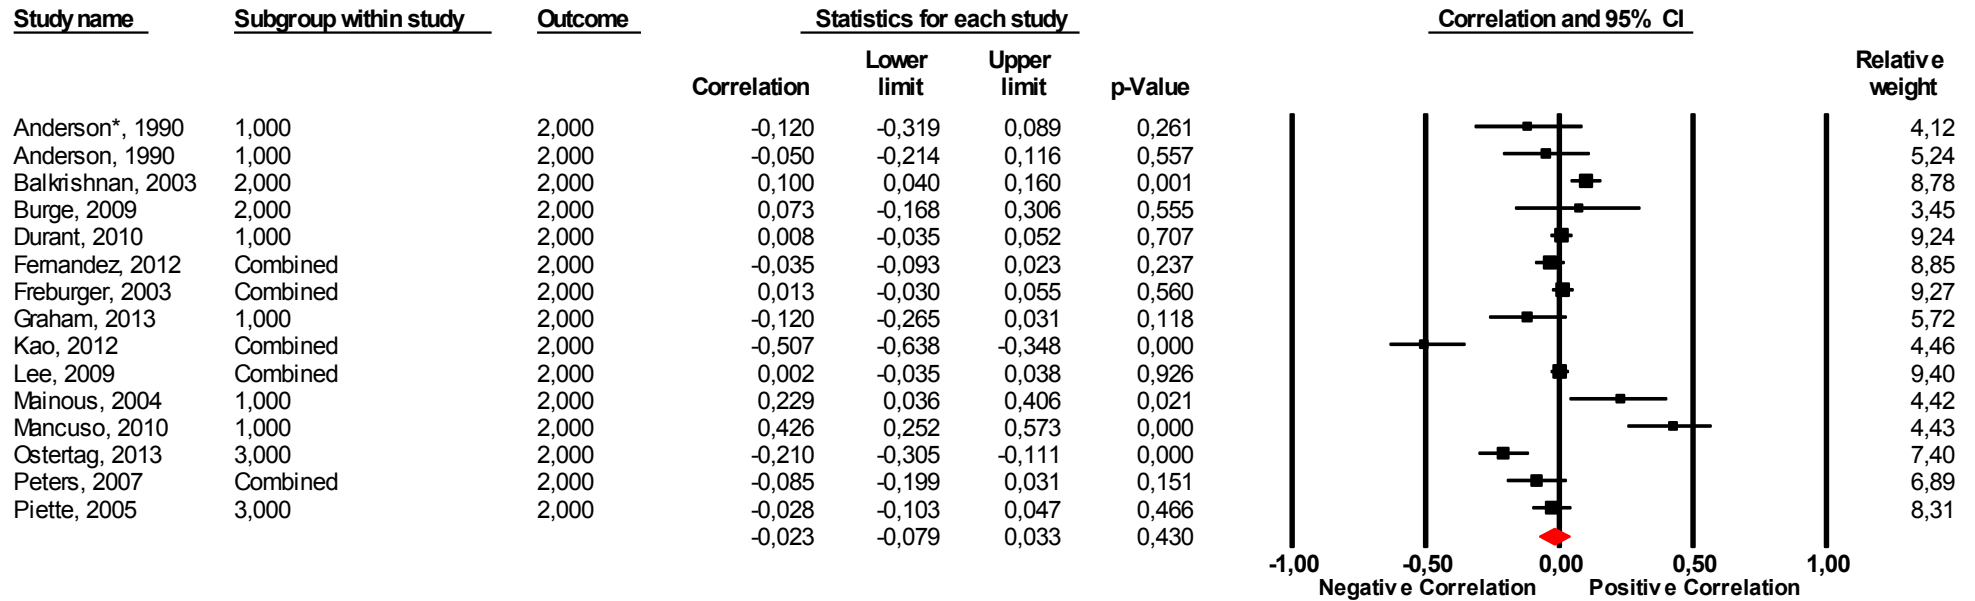

## Data set for Forest plot

| Study name        | Subgroup within study | Outcome | Correlation | Lower limit | Upper limit | p-Value |
|-------------------|-----------------------|---------|-------------|-------------|-------------|---------|
| Anderson*, 1990   | 1                     | 2       | -0,12       | -0,32       | 0,09        | 0,26    |
| Anderson, 1990    | 1                     | 2       | -0,05       | -0,21       | 0,12        | 0,56    |
| Balkrishnan, 2003 | 2                     | 2       | 0,10        | 0,04        | 0,16        | 0,00    |
| Burge, 2009       | 2                     | 2       | 0,07        | -0,17       | 0,31        | 0,56    |
| Durant, 2010      | 1                     | 2       | 0,01        | -0,04       | 0,05        | 0,71    |
| Fernandez, 2012   | Combined              | 2       | -0,04       | -0,09       | 0,02        | 0,24    |
| Freburger, 2003   | Combined              | 2       | 0,01        | -0,03       | 0,06        | 0,56    |
| Graham, 2013      | 1                     | 2       | -0,12       | -0,27       | 0,03        | 0,12    |
| Kao, 2012         | Combined              | 2       | -0,51       | -0,64       | -0,35       | 0,00    |
| Lee, 2009         | Combined              | 2       | 0,00        | -0,03       | 0,04        | 0,93    |
| Mainous, 2004     | 1                     | 2       | 0,23        | 0,04        | 0,41        | 0,02    |
| Mancuso, 2010     | 1                     | 2       | 0,43        | 0,25        | 0,57        | 0,00    |
| Ostertag, 2013    | 3                     | 2       | -0,21       | -0,30       | -0,11       | 0,00    |
| Peters, 2007      | Combined              | 2       | -0,09       | -0,20       | 0,03        | 0,15    |
| Piette, 2005      | 3                     | 2       | -0,03       | -0,10       | 0,05        | 0,47    |
|                   |                       |         | -0,02       | -0,08       | 0,03        | 0,43    |

Note. \*Described as a second independent study population in article, therefore separately included in analysis.

### Analysis including observer-rated outcomes

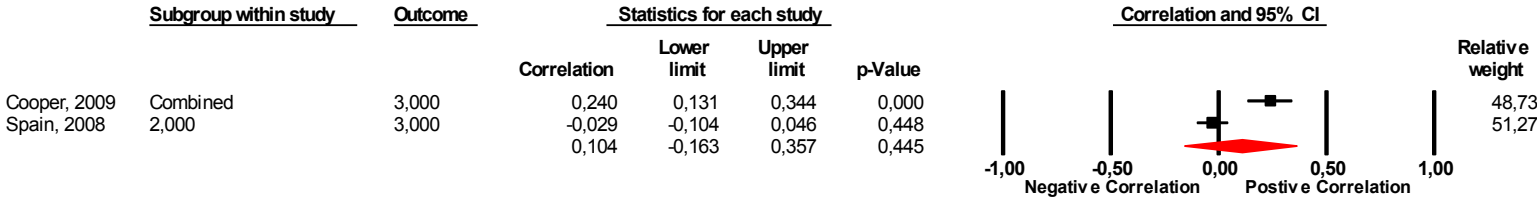

## Data set for Forest plot

| Study name   | Subgroup within study | Outcome | Correlation | Lower limit | Upper limit | p-Value |
|--------------|-----------------------|---------|-------------|-------------|-------------|---------|
| Cooper, 2009 | Combined              | 3       | 0,24        | 0,13        | 0,34        | 0,00    |
| Spain, 2008  | 2                     | 3       | -0,03       | -0,10       | 0,05        | 0,45    |
|              |                       |         | 0,10        | -0,16       | 0,36        | 0,45    |

## Analysis of subjective health outcomes

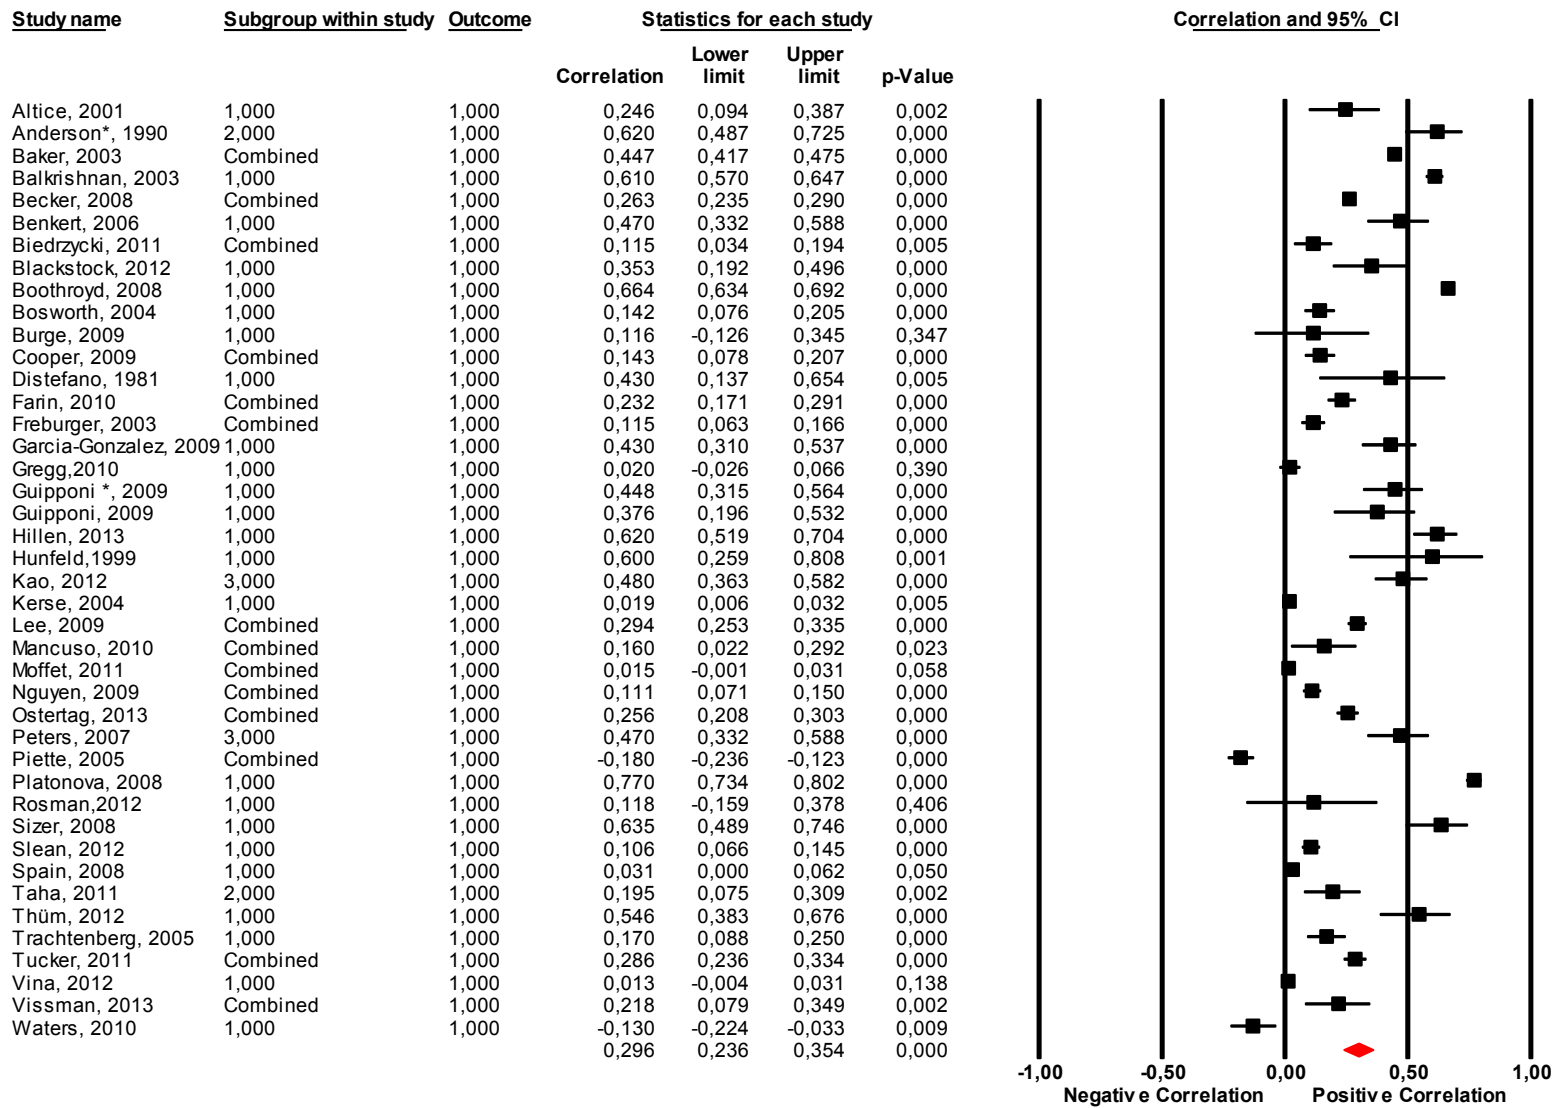



## Data set for Forest plot

| Study name            | Subgroup within study | Outcome | Correlation | Lower limit | Upper limit | p-Value |
|-----------------------|-----------------------|---------|-------------|-------------|-------------|---------|
| Altice, 2001          | 1                     | 1       | 0,25        | 0,09        | 0,39        | 0,00    |
| Anderson*, 1990       | 2                     | 1       | 0,62        | 0,49        | 0,73        | 0,00    |
| Baker, 2003           | Combined              | 1       | 0,45        | 0,42        | 0,48        | 0,00    |
| Balkrishnan, 2003     | 1                     | 1       | 0,61        | 0,57        | 0,65        | 0,00    |
| Becker, 2008          | Combined              | 1       | 0,26        | 0,23        | 0,29        | 0,00    |
| Benkert, 2006         | 1                     | 1       | 0,47        | 0,33        | 0,59        | 0,00    |
| Biedrzycki, 2011      | Combined              | 1       | 0,12        | 0,03        | 0,19        | 0,01    |
| Blackstock, 2012      | 1                     | 1       | 0,35        | 0,19        | 0,50        | 0,00    |
| Boothroyd, 2008       | 1                     | 1       | 0,66        | 0,63        | 0,69        | 0,00    |
| Bosworth, 2004        | 1                     | 1       | 0,14        | 0,08        | 0,21        | 0,00    |
| Burge, 2009           | 1                     | 1       | 0,12        | -0,13       | 0,34        | 0,35    |
| Cooper, 2009          | Combined              | 1       | 0,14        | 0,08        | 0,21        | 0,00    |
| Distefano, 1981       | 1                     | 1       | 0,43        | 0,14        | 0,65        | 0,01    |
| Farin, 2010           | Combined              | 1       | 0,23        | 0,17        | 0,29        | 0,00    |
| Freburger, 2003       | Combined              | 1       | 0,12        | 0,06        | 0,17        | 0,00    |
| Garcia-Gonzalez, 2009 | 1                     | 1       | 0,43        | 0,31        | 0,54        | 0,00    |
| Gregg, 2010           | 1                     | 1       | 0,02        | -0,03       | 0,07        | 0,39    |
| Guipponi *, 2009      | 1                     | 1       | 0,45        | 0,32        | 0,56        | 0,00    |
| Guipponi, 2009        | 1                     | 1       | 0,38        | 0,20        | 0,53        | 0,00    |
| Hillen, 2013          | 1                     | 1       | 0,62        | 0,52        | 0,70        | 0,00    |
| Hunfeld, 1999         | 1                     | 1       | 0,60        | 0,26        | 0,81        | 0,00    |
| Kao, 2012             | 3                     | 1       | 0,48        | 0,36        | 0,58        | 0,00    |
| Kerse, 2004           | 1                     | 1       | 0,02        | 0,01        | 0,03        | 0,00    |
| Lee, 2009             | Combined              | 1       | 0,29        | 0,25        | 0,33        | 0,00    |
| Mancuso, 2010         | Combined              | 1       | 0,16        | 0,02        | 0,29        | 0,02    |
| Moffet, 2011          | Combined              | 1       | 0,02        | 0,00        | 0,03        | 0,06    |
| Nguyen, 2009          | Combined              | 1       | 0,11        | 0,07        | 0,15        | 0,00    |
| Ostertag, 2013        | Combined              | 1       | 0,26        | 0,21        | 0,30        | 0,00    |
| Peters, 2007          | 3                     | 1       | 0,47        | 0,33        | 0,59        | 0,00    |
| Piette, 2005          | Combined              | 1       | -0,18       | -0,24       | -0,12       | 0,00    |
| Platonova, 2008       | 1                     | 1       | 0,77        | 0,73        | 0,80        | 0,00    |
| Rosman, 2012          | 1                     | 1       | 0,12        | -0,16       | 0,38        | 0,41    |
| Sizer, 2008           | 1                     | 1       | 0,64        | 0,49        | 0,75        | 0,00    |
| Slean, 2012           | 1                     | 1       | 0,11        | 0,07        | 0,15        | 0,00    |

|                       |          |   |   |       |       |       |      |
|-----------------------|----------|---|---|-------|-------|-------|------|
| Spain, 2008           |          | 1 | 1 | 0,03  | 0,00  | 0,06  | 0,05 |
| Taha, 2011            |          | 2 | 1 | 0,20  | 0,08  | 0,31  | 0,00 |
| Thüm, 2012            |          | 1 | 1 | 0,55  | 0,38  | 0,68  | 0,00 |
| Trachtenberg,<br>2005 |          | 1 | 1 | 0,17  | 0,09  | 0,25  | 0,00 |
| Tucker, 2011          | Combined |   | 1 | 0,29  | 0,24  | 0,33  | 0,00 |
| Vina, 2012            |          | 1 | 1 | 0,01  | 0,00  | 0,03  | 0,14 |
| Vissman, 2013         | Combined |   | 1 | 0,22  | 0,08  | 0,35  | 0,00 |
| Waters, 2010          |          | 1 | 1 | -0,13 | -0,22 | -0,03 | 0,01 |
|                       |          |   |   | 0,30  | 0,24  | 0,35  | 0,00 |

## Analysis including health behavior as outcome

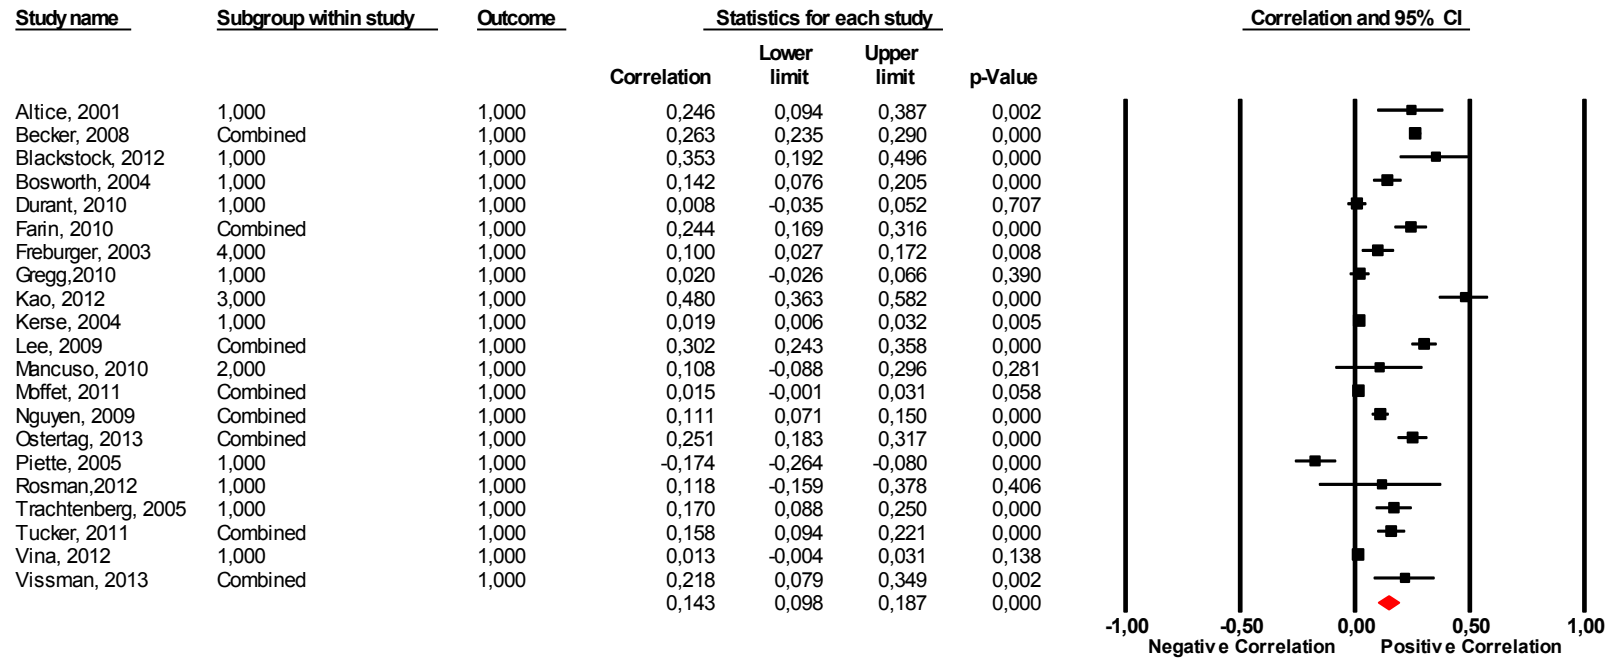

## Data set for Forest plot

|                       | Subgroup<br>within<br>study | Outcome | Correlation | Lower limit | Upper limit | p-Value |
|-----------------------|-----------------------------|---------|-------------|-------------|-------------|---------|
| Altice, 2001          | 1                           | 1       | 0,25        | 0,09        | 0,39        | 0,00    |
| Becker, 2008          | Combined                    | 1       | 0,26        | 0,23        | 0,29        | 0,00    |
| Blackstock, 2012      | 1                           | 1       | 0,35        | 0,19        | 0,50        | 0,00    |
| Bosworth, 2004        | 1                           | 1       | 0,14        | 0,08        | 0,21        | 0,00    |
| Durant, 2010          | 1                           | 1       | 0,01        | -0,04       | 0,05        | 0,71    |
| Farin, 2010           | Combined                    | 1       | 0,24        | 0,17        | 0,32        | 0,00    |
| Freburger, 2003       | 4                           | 1       | 0,10        | 0,03        | 0,17        | 0,01    |
| Gregg, 2010           | 1                           | 1       | 0,02        | -0,03       | 0,07        | 0,39    |
| Kao, 2012             | 3                           | 1       | 0,48        | 0,36        | 0,58        | 0,00    |
| Kerse, 2004           | 1                           | 1       | 0,02        | 0,01        | 0,03        | 0,00    |
| Lee, 2009             | Combined                    | 1       | 0,30        | 0,24        | 0,36        | 0,00    |
| Mancuso, 2010         | 2                           | 1       | 0,11        | -0,09       | 0,30        | 0,28    |
| Moffet, 2011          | Combined                    | 1       | 0,02        | 0,00        | 0,03        | 0,06    |
| Nguyen, 2009          | Combined                    | 1       | 0,11        | 0,07        | 0,15        | 0,00    |
| Ostertag, 2013        | Combined                    | 1       | 0,25        | 0,18        | 0,32        | 0,00    |
| Piette, 2005          | 1                           | 1       | -0,17       | -0,26       | -0,08       | 0,00    |
| Rosman, 2012          | 1                           | 1       | 0,12        | -0,16       | 0,38        | 0,41    |
| Trachtenberg,<br>2005 | 1                           | 1       | 0,17        | 0,09        | 0,25        | 0,00    |
| Tucker, 2011          | Combined                    | 1       | 0,16        | 0,09        | 0,22        | 0,00    |
| Vina, 2012            | 1                           | 1       | 0,01        | 0,00        | 0,03        | 0,14    |
| Vissman, 2013         | Combined                    | 1       | 0,22        | 0,08        | 0,35        | 0,00    |
|                       |                             |         | 0,14        | 0,10        | 0,19        | 0,00    |

## Analysis including health-related subjective experience as outcome

| Study name            | Subgroup within study | Outcome | Statistics for each study |             |             |         | Correlation and 95% CI | Relative weight |
|-----------------------|-----------------------|---------|---------------------------|-------------|-------------|---------|------------------------|-----------------|
|                       |                       |         | Correlation               | Lower limit | Upper limit | p-Value |                        |                 |
| Anderson*, 1990       | 2,000                 | 2,000   | 0,620                     | 0,487       | 0,725       | 0,000   | 3,32                   |                 |
| Baker, 2003           | Combined              | 2,000   | 0,447                     | 0,417       | 0,475       | 0,000   | 3,65                   |                 |
| Balkrishnan, 2003     | 1,000                 | 2,000   | 0,610                     | 0,570       | 0,647       | 0,000   | 3,63                   |                 |
| Benkert, 2006         | 1,000                 | 2,000   | 0,470                     | 0,332       | 0,588       | 0,000   | 3,41                   |                 |
| Biedrzycki, 2011      | Combined              | 2,000   | 0,115                     | 0,034       | 0,194       | 0,005   | 3,60                   |                 |
| Boothroyd, 2008       | 1,000                 | 2,000   | 0,664                     | 0,634       | 0,692       | 0,000   | 3,64                   |                 |
| Burge, 2009           | Combined              | 2,000   | 0,095                     | -0,077      | 0,261       | 0,280   | 3,39                   |                 |
| Cooper, 2009          | Combined              | 2,000   | 0,055                     | -0,010      | 0,121       | 0,099   | 3,62                   |                 |
| Distefano, 1981       | 1,000                 | 2,000   | 0,430                     | 0,137       | 0,654       | 0,005   | 2,84                   |                 |
| Farin, 2010           | 1,000                 | 2,000   | 0,208                     | 0,100       | 0,311       | 0,000   | 3,55                   |                 |
| Freburger, 2003       | 5,000                 | 2,000   | 0,130                     | 0,057       | 0,202       | 0,000   | 3,61                   |                 |
| García-Gonzalez, 2009 | 1,000                 | 2,000   | 0,430                     | 0,310       | 0,537       | 0,000   | 3,48                   |                 |
| Guipponi *, 2009      | 1,000                 | 2,000   | 0,448                     | 0,315       | 0,564       | 0,000   | 3,43                   |                 |
| Guipponi, 2009        | 1,000                 | 2,000   | 0,376                     | 0,196       | 0,532       | 0,000   | 3,31                   |                 |
| Hillen, 2013          | 1,000                 | 2,000   | 0,620                     | 0,519       | 0,704       | 0,000   | 3,45                   |                 |
| Hunfeld, 1999         | 1,000                 | 2,000   | 0,600                     | 0,259       | 0,808       | 0,001   | 2,43                   |                 |
| Lee, 2009             | Combined              | 2,000   | 0,287                     | 0,227       | 0,344       | 0,000   | 3,62                   |                 |
| Mancuso, 2010         | 3,000                 | 2,000   | 0,211                     | 0,017       | 0,389       | 0,033   | 3,31                   |                 |
| Ostertag, 2013        | Combined              | 2,000   | 0,260                     | 0,192       | 0,326       | 0,000   | 3,61                   |                 |
| Peters, 2007          | 3,000                 | 2,000   | 0,470                     | 0,332       | 0,588       | 0,000   | 3,41                   |                 |
| Piette, 2005          | 2,000                 | 2,000   | -0,184                    | -0,254      | -0,112      | 0,000   | 3,61                   |                 |
| Platonova, 2008       | 1,000                 | 2,000   | 0,770                     | 0,734       | 0,802       | 0,000   | 3,60                   |                 |
| Sizer, 2008           | 1,000                 | 2,000   | 0,635                     | 0,489       | 0,746       | 0,000   | 3,25                   |                 |
| Slean, 2012           | 1,000                 | 2,000   | 0,106                     | 0,066       | 0,145       | 0,000   | 3,65                   |                 |
| Spain, 2008           | 1,000                 | 2,000   | 0,031                     | 0,000       | 0,062       | 0,050   | 3,65                   |                 |
| Taha, 2011            | 2,000                 | 2,000   | 0,195                     | 0,075       | 0,309       | 0,002   | 3,52                   |                 |
| Thüm, 2012            | 1,000                 | 2,000   | 0,546                     | 0,383       | 0,676       | 0,000   | 3,27                   |                 |
| Tucker, 2011          | Combined              | 2,000   | 0,511                     | 0,439       | 0,576       | 0,000   | 3,58                   |                 |
| Waters, 2010          | 1,000                 | 2,000   | 0,130                     | 0,033       | 0,224       | 0,009   | 3,57                   |                 |
|                       |                       |         | 0,373                     | 0,270       | 0,467       | 0,000   |                        |                 |

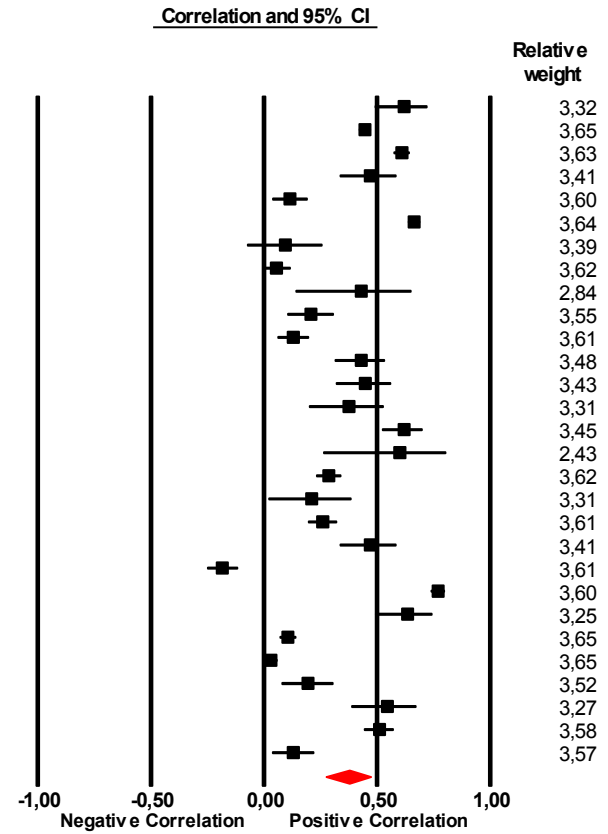

## Data set for Forest plot

| Study name            | Subgroup within study | Outcome | Correlation | Lower limit | Upper limit | p-Value |
|-----------------------|-----------------------|---------|-------------|-------------|-------------|---------|
| Anderson*, 1990       | 2                     | 2       | 0,62        | 0,49        | 0,73        | 0,00    |
| Baker, 2003           | Combined              | 2       | 0,45        | 0,42        | 0,48        | 0,00    |
| Balkrishnan, 2003     | 1                     | 2       | 0,61        | 0,57        | 0,65        | 0,00    |
| Benkert, 2006         | 1                     | 2       | 0,47        | 0,33        | 0,59        | 0,00    |
| Biedrzycki, 2011      | Combined              | 2       | 0,12        | 0,03        | 0,19        | 0,01    |
| Boothroyd, 2008       | 1                     | 2       | 0,66        | 0,63        | 0,69        | 0,00    |
| Burge, 2009           | Combined              | 2       | 0,09        | -0,08       | 0,26        | 0,28    |
| Cooper, 2009          | Combined              | 2       | 0,06        | -0,01       | 0,12        | 0,10    |
| Distefano, 1981       | 1                     | 2       | 0,43        | 0,14        | 0,65        | 0,01    |
| Farin, 2010           | 1                     | 2       | 0,21        | 0,10        | 0,31        | 0,00    |
| Freburger, 2003       | 5                     | 2       | 0,13        | 0,06        | 0,20        | 0,00    |
| Garcia-Gonzalez, 2009 | 1                     | 2       | 0,43        | 0,31        | 0,54        | 0,00    |
| Guipponi*, 2009       | 1                     | 2       | 0,45        | 0,32        | 0,56        | 0,00    |
| Guipponi, 2009        | 1                     | 2       | 0,38        | 0,20        | 0,53        | 0,00    |
| Hillen, 2013          | 1                     | 2       | 0,62        | 0,52        | 0,70        | 0,00    |
| Hunfeld, 1999         | 1                     | 2       | 0,60        | 0,26        | 0,81        | 0,00    |
| Lee, 2009             | Combined              | 2       | 0,29        | 0,23        | 0,34        | 0,00    |
| Mancuso, 2010         | 3                     | 2       | 0,21        | 0,02        | 0,39        | 0,03    |
| Ostertag, 2013        | Combined              | 2       | 0,26        | 0,19        | 0,33        | 0,00    |
| Peters, 2007          | 3                     | 2       | 0,47        | 0,33        | 0,59        | 0,00    |
| Piette, 2005          | 2                     | 2       | -0,18       | -0,25       | -0,11       | 0,00    |
| Platonova, 2008       | 1                     | 2       | 0,77        | 0,73        | 0,80        | 0,00    |
| Sizer, 2008           | 1                     | 2       | 0,64        | 0,49        | 0,75        | 0,00    |
| Slean, 2012           | 1                     | 2       | 0,11        | 0,07        | 0,15        | 0,00    |
| Spain, 2008           | 1                     | 2       | 0,03        | 0,00        | 0,06        | 0,05    |
| Taha, 2011            | 2                     | 2       | 0,20        | 0,08        | 0,31        | 0,00    |
| Thüm, 2012            | 1                     | 2       | 0,55        | 0,38        | 0,68        | 0,00    |
| Tucker, 2011          | Combined              | 2       | 0,51        | 0,44        | 0,58        | 0,00    |
| Waters, 2010          | 1                     | 2       | 0,13        | 0,03        | 0,22        | 0,01    |
|                       |                       |         | 0,37        | 0,27        | 0,47        | 0,00    |

Note. \*Described as a second independent study population in article, therefore separately included in analysis.

## Analysis of patient satisfaction as outcome

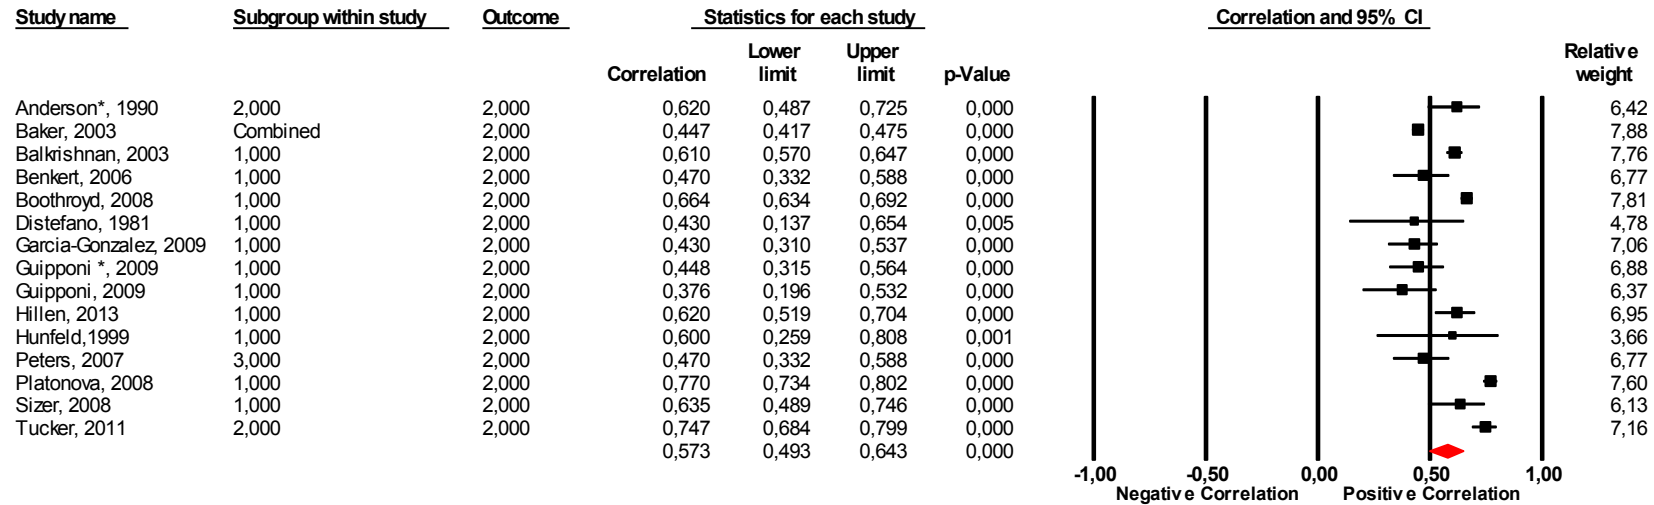

## Data set for Forest plot

|                       | Subgroup<br>within<br>study | Outcome | Correlation | Lower limit | Upper limit | p-Value |
|-----------------------|-----------------------------|---------|-------------|-------------|-------------|---------|
| Altice, 2001          | 1                           | 1       | 0,25        | 0,09        | 0,39        | 0,00    |
| Becker, 2008          | Combined                    | 1       | 0,26        | 0,23        | 0,29        | 0,00    |
| Blackstock, 2012      | 1                           | 1       | 0,35        | 0,19        | 0,50        | 0,00    |
| Bosworth, 2004        | 1                           | 1       | 0,14        | 0,08        | 0,21        | 0,00    |
| Durant, 2010          | 1                           | 1       | 0,01        | -0,04       | 0,05        | 0,71    |
| Farin, 2010           | Combined                    | 1       | 0,24        | 0,17        | 0,32        | 0,00    |
| Freburger, 2003       | 4                           | 1       | 0,10        | 0,03        | 0,17        | 0,01    |
| Gregg, 2010           | 1                           | 1       | 0,02        | -0,03       | 0,07        | 0,39    |
| Kao, 2012             | 3                           | 1       | 0,48        | 0,36        | 0,58        | 0,00    |
| Kerse, 2004           | 1                           | 1       | 0,02        | 0,01        | 0,03        | 0,00    |
| Lee, 2009             | Combined                    | 1       | 0,30        | 0,24        | 0,36        | 0,00    |
| Mancuso, 2010         | 2                           | 1       | 0,11        | -0,09       | 0,30        | 0,28    |
| Moffet, 2011          | Combined                    | 1       | 0,02        | 0,00        | 0,03        | 0,06    |
| Nguyen, 2009          | Combined                    | 1       | 0,11        | 0,07        | 0,15        | 0,00    |
| Ostertag, 2013        | Combined                    | 1       | 0,25        | 0,18        | 0,32        | 0,00    |
| Piette, 2005          | 1                           | 1       | -0,17       | -0,26       | -0,08       | 0,00    |
| Rosman, 2012          | 1                           | 1       | 0,12        | -0,16       | 0,38        | 0,41    |
| Trachtenberg,<br>2005 | 1                           | 1       | 0,17        | 0,09        | 0,25        | 0,00    |
| Tucker, 2011          | Combined                    | 1       | 0,16        | 0,09        | 0,22        | 0,00    |
| Vina, 2012            | 1                           | 1       | 0,01        | 0,00        | 0,03        | 0,14    |
| Vissman, 2013         | Combined                    | 1       | 0,22        | 0,08        | 0,35        | 0,00    |
|                       |                             |         | 0,14        | 0,10        | 0,19        | 0,00    |

Note. \*Described as a second independent study population in article, therefore separately included in analysis.



## Analysis of health related quality of life as outcome

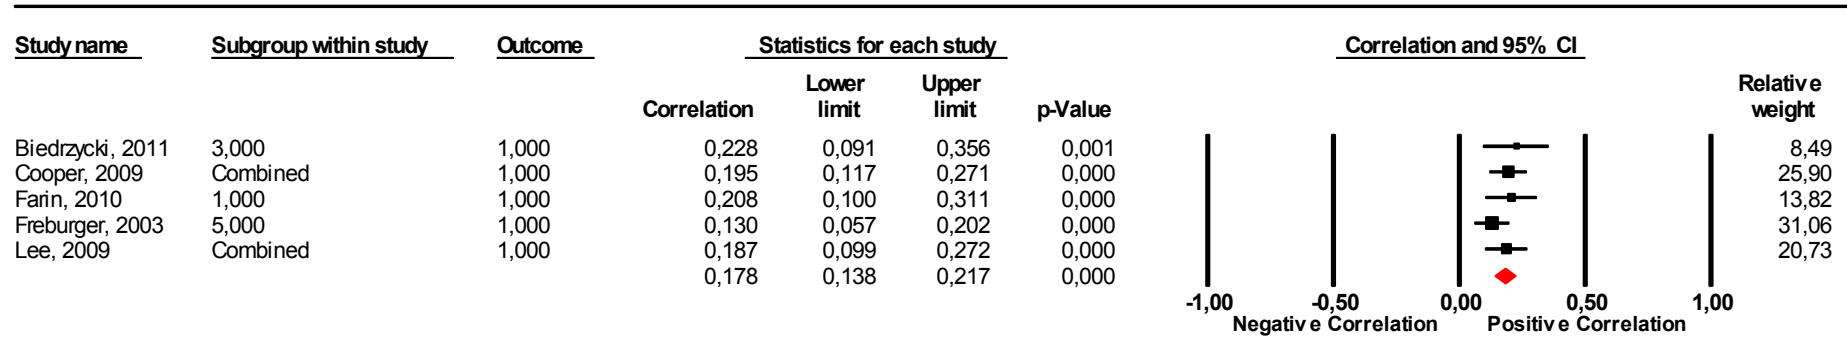

## Data set for Forest plot

| Study name       | Subgroup Outcome |   | Correlation | Lower limit | Upper limit | p-Value |
|------------------|------------------|---|-------------|-------------|-------------|---------|
|                  | within study     |   |             |             |             |         |
| Biedrzycki, 2011 | 3                | 1 | 0,23        | 0,09        | 0,36        | 0,00    |
| Cooper, 2009     | Combined         | 1 | 0,20        | 0,12        | 0,27        | 0,00    |
| Farin, 2010      | 1                | 1 | 0,21        | 0,10        | 0,31        | 0,00    |
| Freburger, 2003  | 5                | 1 | 0,13        | 0,06        | 0,20        | 0,00    |
| Lee, 2009        | Combined         | 1 | 0,19        | 0,10        | 0,27        | 0,00    |
|                  |                  |   | 0,18        | 0,14        | 0,22        | 0,00    |

## Analysis including symptom related outcomes

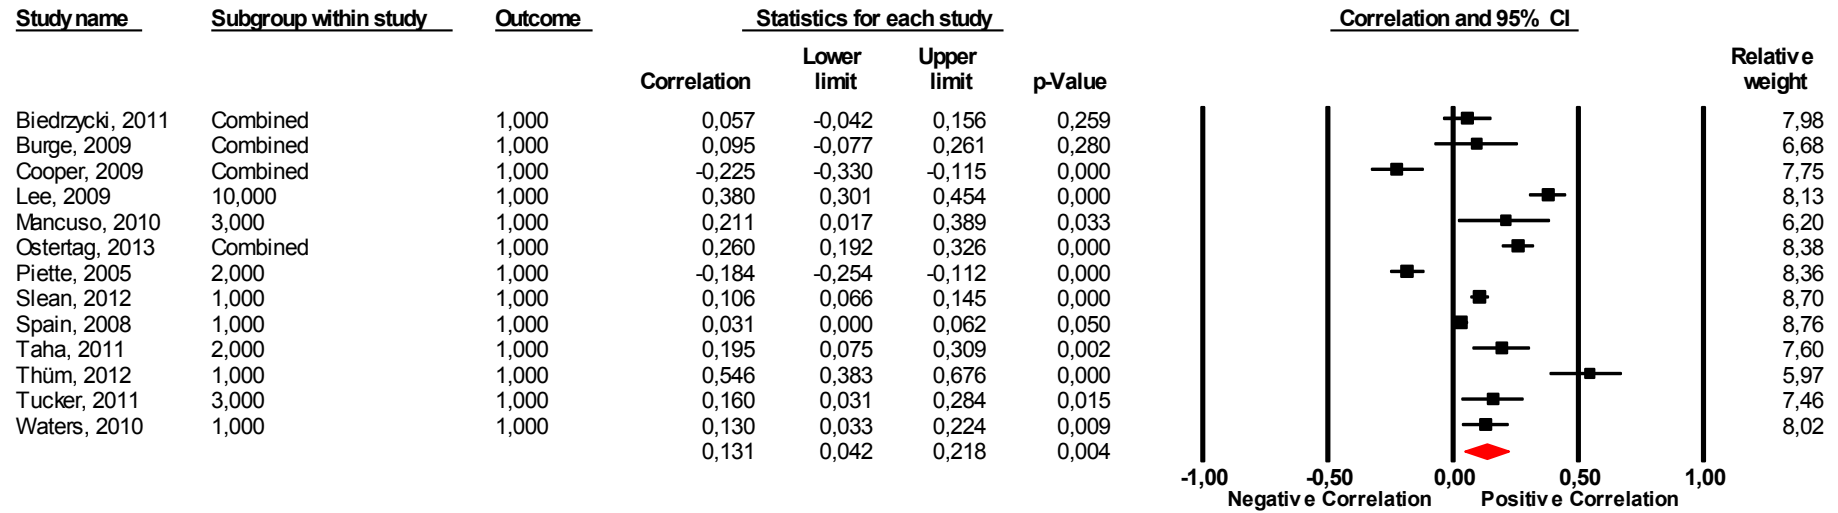

## Data set for Forest plot

| Study name       | Subgroup within study | Outcome | Correlation | Lower limit | Upper limit | p-Value |
|------------------|-----------------------|---------|-------------|-------------|-------------|---------|
| Biedrzycki, 2011 | Combined              | 1       | 0,06        | -0,04       | 0,16        | 0,26    |
| Burge, 2009      | Combined              | 1       | 0,09        | -0,08       | 0,26        | 0,28    |
| Cooper, 2009     | Combined              | 1       | -0,23       | -0,33       | -0,11       | 0,00    |
| Lee, 2009        | 10                    | 1       | 0,38        | 0,30        | 0,45        | 0,00    |
| Mancuso, 2010    | 3                     | 1       | 0,21        | 0,02        | 0,39        | 0,03    |
| Ostertag, 2013   | Combined              | 1       | 0,26        | 0,19        | 0,33        | 0,00    |
| Piette, 2005     | 2                     | 1       | -0,18       | -0,25       | -0,11       | 0,00    |
| Slean, 2012      | 1                     | 1       | 0,11        | 0,07        | 0,15        | 0,00    |
| Spain, 2008      | 1                     | 1       | 0,03        | 0,00        | 0,06        | 0,05    |
| Taha, 2011       | 2                     | 1       | 0,20        | 0,08        | 0,31        | 0,00    |
| Thüm, 2012       | 1                     | 1       | 0,55        | 0,38        | 0,68        | 0,00    |
| Tucker, 2011     | 3                     | 1       | 0,16        | 0,03        | 0,28        | 0,02    |
| Waters, 2010     | 1                     | 1       | 0,13        | 0,03        | 0,22        | 0,01    |
|                  |                       |         | 0,13        | 0,04        | 0,22        | 0,00    |

## Analysis including correlational data

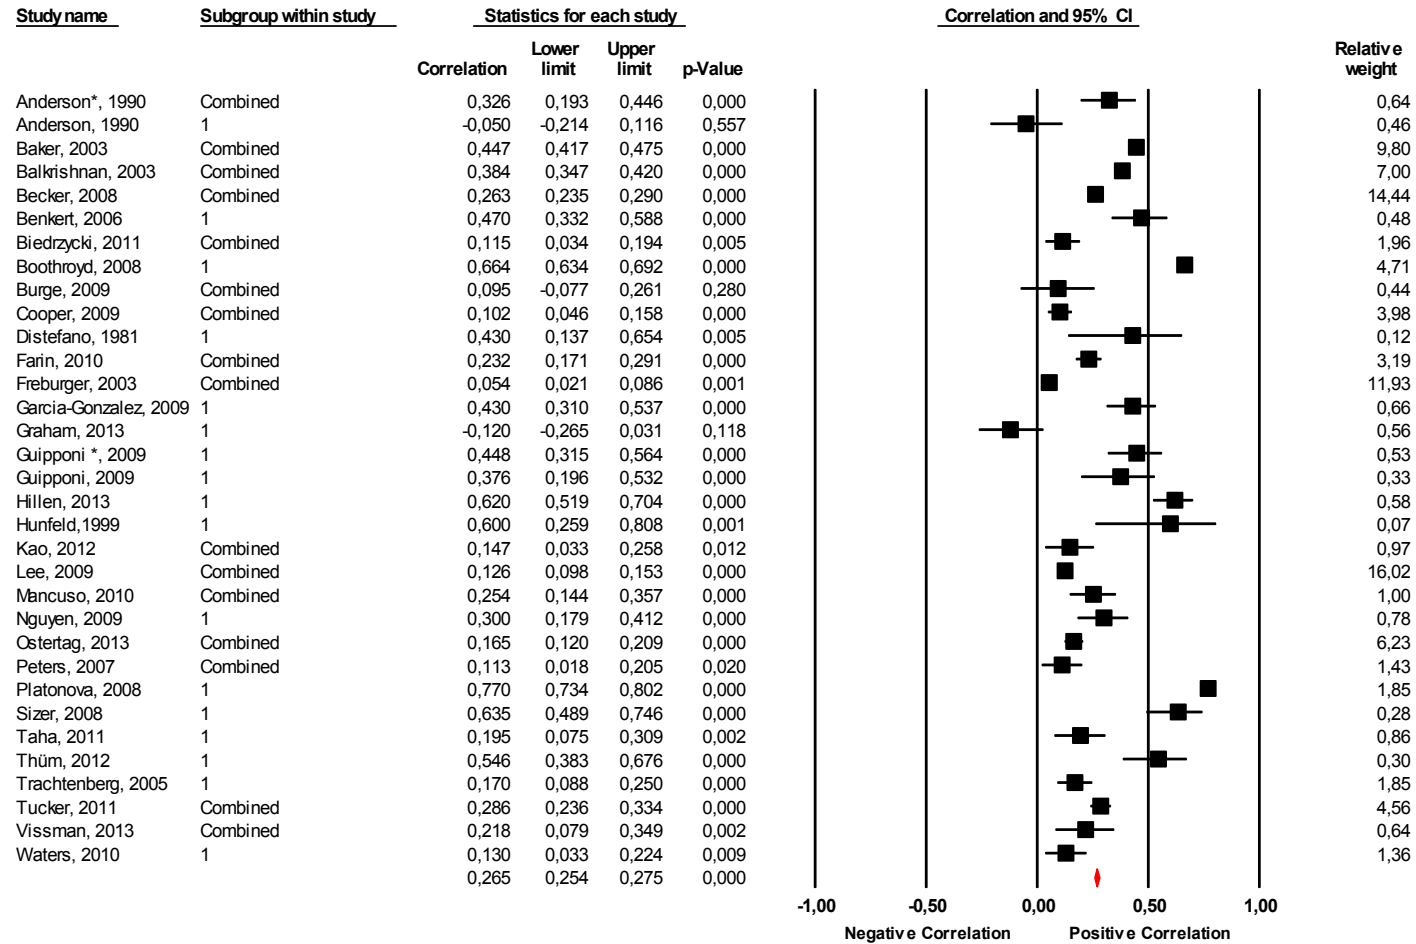

## Data set for Forest plot

| Study name            | Subgroup within study | Correlation | Lower limit | Upper limit | p-Value |
|-----------------------|-----------------------|-------------|-------------|-------------|---------|
| Anderson*, 1990       | Combined              | 0,33        | 0,19        | 0,45        | 0,00    |
| Anderson, 1990        | 1,00                  | -0,05       | -0,21       | 0,12        | 0,56    |
| Baker, 2003           | Combined              | 0,45        | 0,42        | 0,48        | 0,00    |
| Balkrishnan, 2003     | Combined              | 0,38        | 0,35        | 0,42        | 0,00    |
| Becker, 2008          | Combined              | 0,26        | 0,23        | 0,29        | 0,00    |
| Benkert, 2006         | 1,00                  | 0,47        | 0,33        | 0,59        | 0,00    |
| Biedrzycki, 2011      | Combined              | 0,12        | 0,03        | 0,19        | 0,01    |
| Boothroyd, 2008       | 1,00                  | 0,66        | 0,63        | 0,69        | 0,00    |
| Burge, 2009           | Combined              | 0,09        | -0,08       | 0,26        | 0,28    |
| Cooper, 2009          | Combined              | 0,10        | 0,05        | 0,16        | 0,00    |
| Distefano, 1981       | 1,00                  | 0,43        | 0,14        | 0,65        | 0,01    |
| Farin, 2010           | Combined              | 0,23        | 0,17        | 0,29        | 0,00    |
| Freburger, 2003       | Combined              | 0,05        | 0,02        | 0,09        | 0,00    |
| Garcia-Gonzalez, 2009 | 1,00                  | 0,43        | 0,31        | 0,54        | 0,00    |
| Graham, 2013          | 1,00                  | -0,12       | -0,27       | 0,03        | 0,12    |
| Guipponi *, 2009      | 1,00                  | 0,45        | 0,32        | 0,56        | 0,00    |
| Guipponi, 2009        | 1,00                  | 0,38        | 0,20        | 0,53        | 0,00    |
| Hillen, 2013          | 1,00                  | 0,62        | 0,52        | 0,70        | 0,00    |
| Hunfeld, 1999         | 1,00                  | 0,60        | 0,26        | 0,81        | 0,00    |
| Kao, 2012             | Combined              | 0,15        | 0,03        | 0,26        | 0,01    |
| Lee, 2009             | Combined              | 0,13        | 0,10        | 0,15        | 0,00    |
| Mancuso, 2010         | Combined              | 0,25        | 0,14        | 0,36        | 0,00    |
| Nguyen, 2009          | 1,00                  | 0,30        | 0,18        | 0,41        | 0,00    |
| Ostertag, 2013        | Combined              | 0,17        | 0,12        | 0,21        | 0,00    |
| Peters, 2007          | Combined              | 0,11        | 0,02        | 0,21        | 0,02    |
| Platonova, 2008       | 1,00                  | 0,77        | 0,73        | 0,80        | 0,00    |
| Sizer, 2008           | 1,00                  | 0,64        | 0,49        | 0,75        | 0,00    |
| Taha, 2011            | 1,00                  | 0,20        | 0,08        | 0,31        | 0,00    |
| Thüm, 2012            | 1,00                  | 0,55        | 0,38        | 0,68        | 0,00    |
| Trachtenberg, 2005    | 1,00                  | 0,17        | 0,09        | 0,25        | 0,00    |
| Tucker, 2011          | Combined              | 0,29        | 0,24        | 0,33        | 0,00    |
| Vissman, 2013         | Combined              | 0,22        | 0,08        | 0,35        | 0,00    |
| Waters, 2010          | 1,00                  | 0,13        | 0,03        | 0,22        | 0,01    |
|                       |                       | 0,31        | 0,24        | 0,38        | 0,00    |

Note. \*Described as a second independent study population in article, therefore separately included in analysis.

### Analysis including binary data

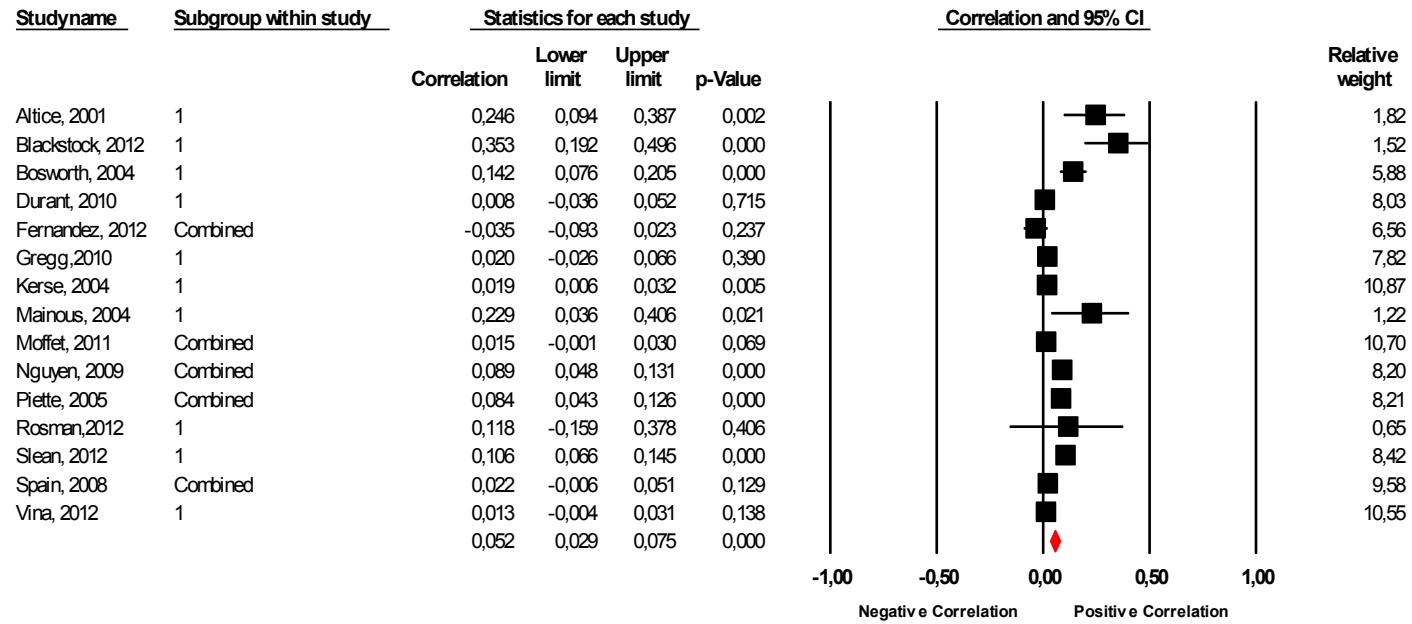

## Data set for Forest plot

| Study name       | Subgroup within study | Correlation | Lower limit | Upper limit | p-Value |
|------------------|-----------------------|-------------|-------------|-------------|---------|
| Altice, 2001     | 1                     | 0,25        | 0,09        | 0,39        | 0,00    |
| Blackstock, 2012 | 1                     | 0,35        | 0,19        | 0,50        | 0,00    |
| Bosworth, 2004   | 1                     | 0,14        | 0,08        | 0,21        | 0,00    |
| Durant, 2010     | 1                     | 0,01        | -0,04       | 0,05        | 0,71    |
| Fernandez, 2012  | Combined              | -0,04       | -0,09       | 0,02        | 0,24    |
| Gregg, 2010      | 1                     | 0,02        | -0,03       | 0,07        | 0,39    |
| Kerse, 2004      | 1                     | 0,02        | 0,01        | 0,03        | 0,00    |
| Mainous, 2004    | 1                     | 0,23        | 0,04        | 0,41        | 0,02    |
| Moffet, 2011     | Combined              | 0,01        | 0,00        | 0,03        | 0,07    |
| Nguyen, 2009     | Combined              | 0,09        | 0,05        | 0,13        | 0,00    |
| Piette, 2005     | Combined              | 0,08        | 0,04        | 0,13        | 0,00    |
| Rosman, 2012     | 1                     | 0,12        | -0,16       | 0,38        | 0,41    |
| Slean, 2012      | 1                     | 0,11        | 0,07        | 0,15        | 0,00    |
| Spain, 2008      | Combined              | 0,02        | -0,01       | 0,05        | 0,13    |
| Vina, 2012       | 1                     | 0,01        | 0,00        | 0,03        | 0,14    |
|                  |                       | 0,05        | 0,03        | 0,08        | 0,00    |



## Analysis including prospective data

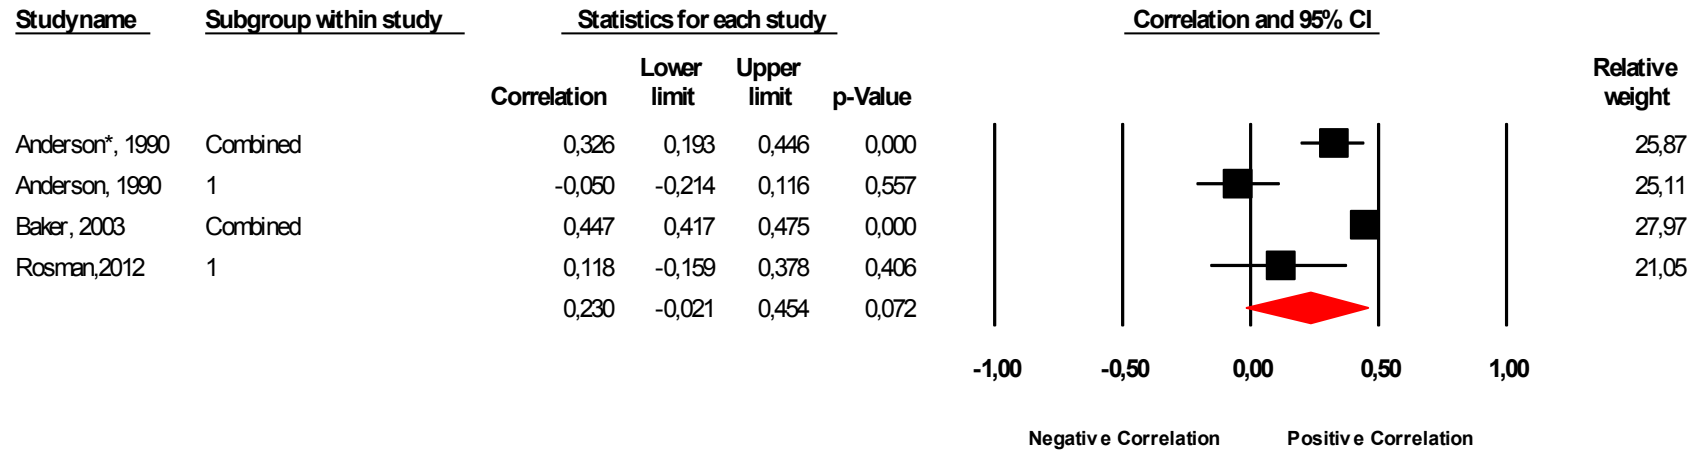

## Data set for Forest plot

| Study name      | Subgroup within study | Correlation | Lower limit | Upper limit | p-Value |
|-----------------|-----------------------|-------------|-------------|-------------|---------|
| Anderson*, 1990 | Combined              | 0,33        | 0,19        | 0,45        | 0,00    |
| Anderson, 1990  | 1,00                  | -0,05       | -0,21       | 0,12        | 0,56    |
| Baker, 2003     | Combined              | 0,45        | 0,42        | 0,48        | 0,00    |
| Rosman,2012     | 1,00                  | 0,12        | -0,16       | 0,38        | 0,41    |
|                 |                       | 0,23        | -0,02       | 0,45        | 0,07    |

Note. \*Described as a second independent study population in article, therefore separately included in analysis.
