# Supplementary material for: Trust in the health care professional and health outcome: A meta-analysis
Source: PubMed Central journal article supplement (PMC5295692; doi:10.1371/journal.pone.0170988), 2017-02-07

# Supporting File S3. Funnel Plots.

## 1. Funnel plot: Analysis including all outcomes

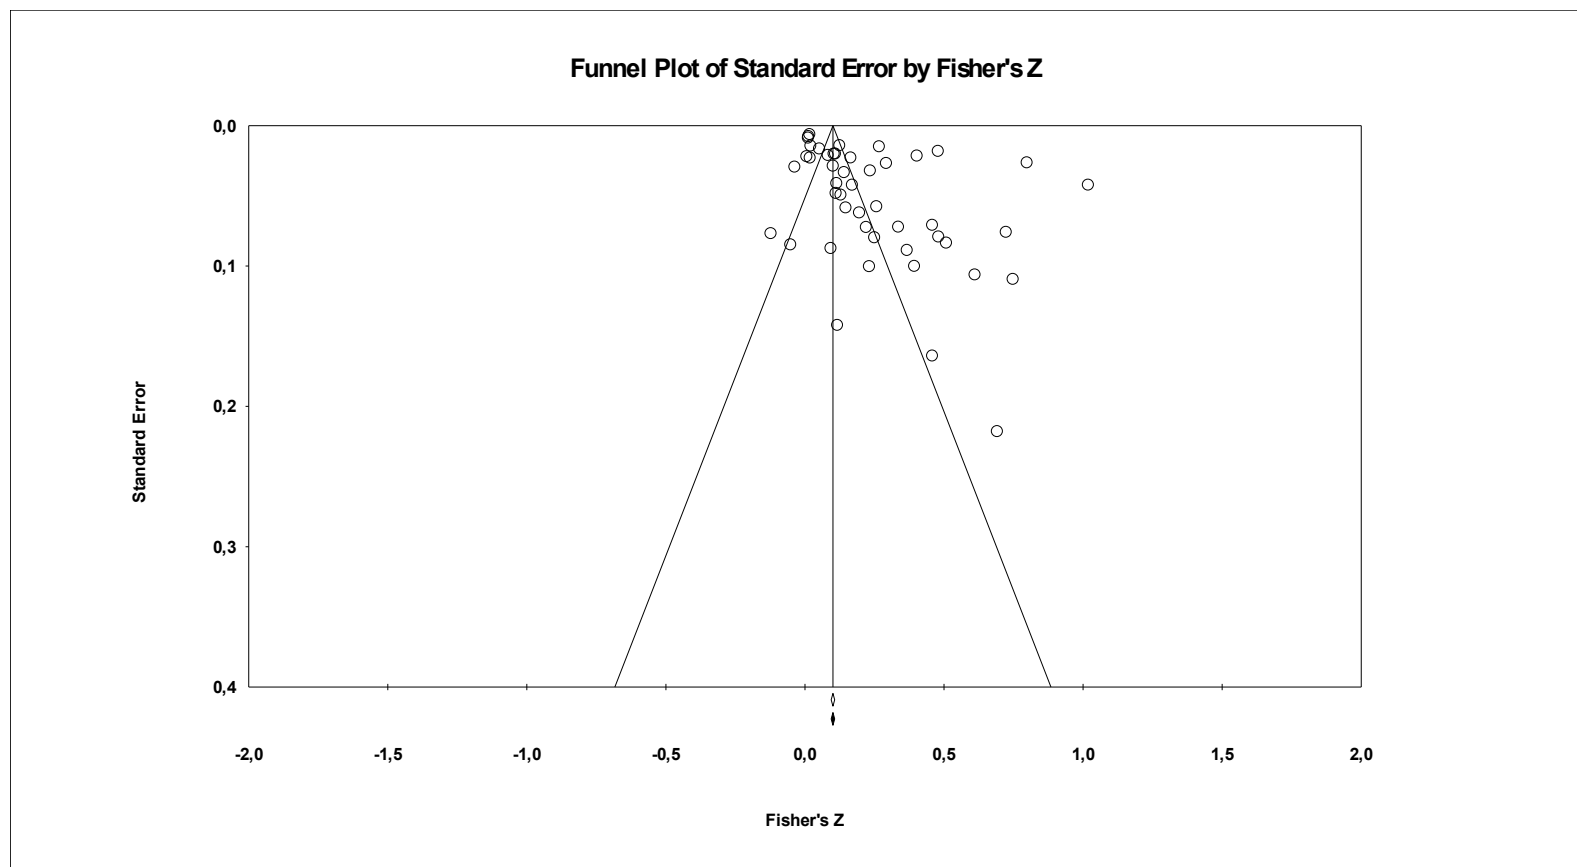

## 2. Funnel plot: Analysis including objective health outcomes

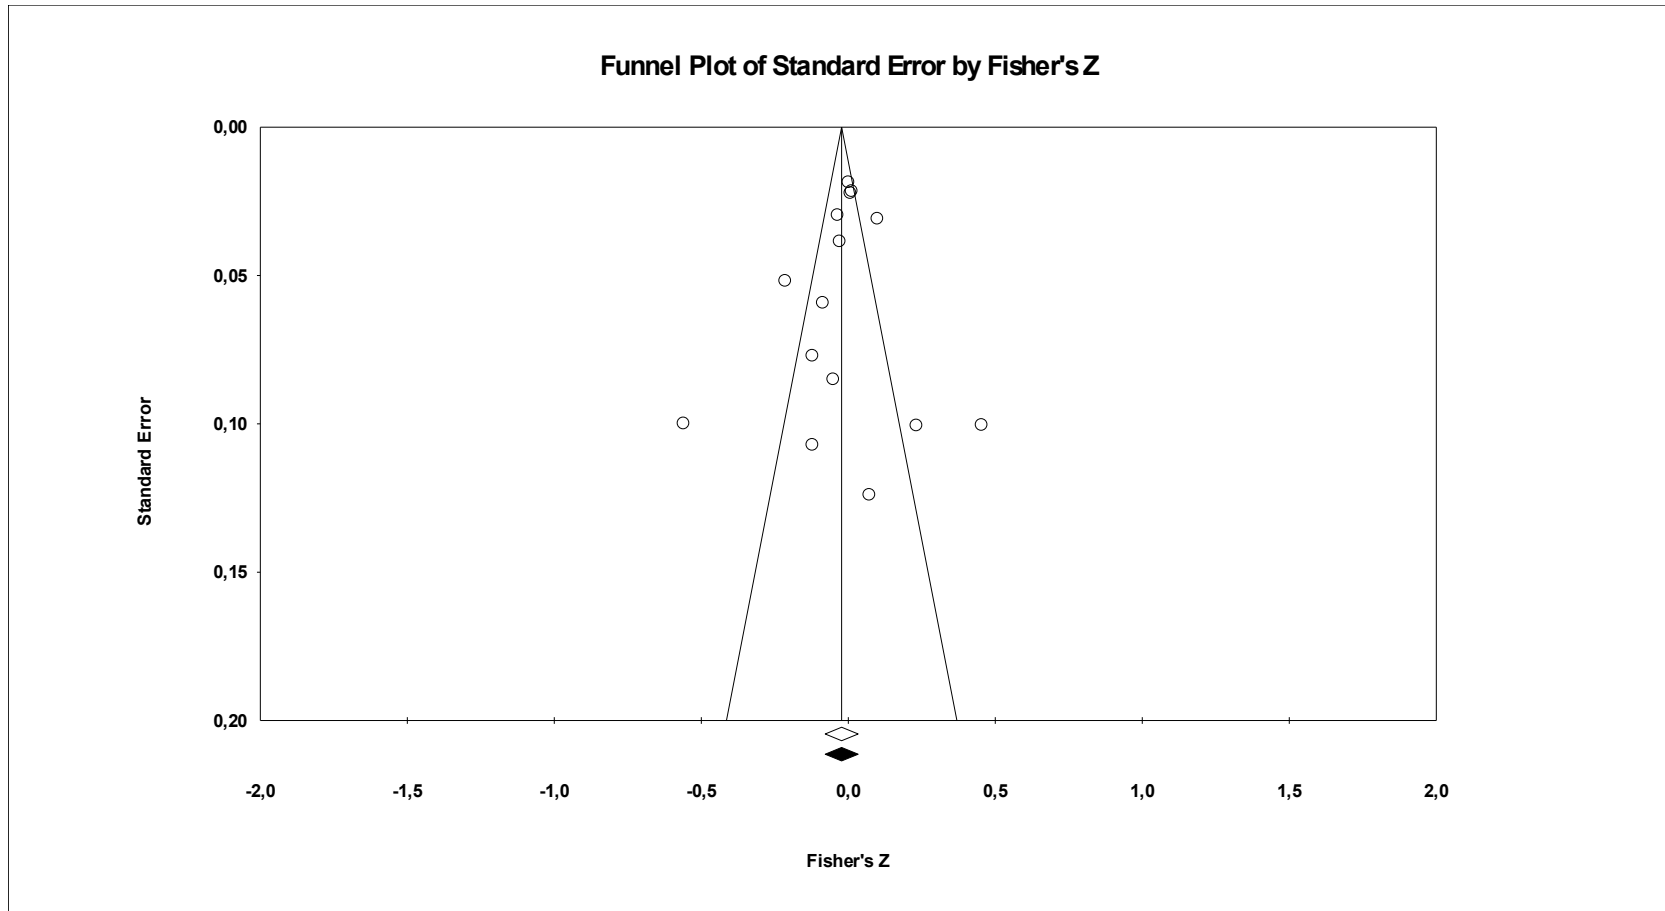

### 3. Funnel plot: Analysis including subjective health outcomes

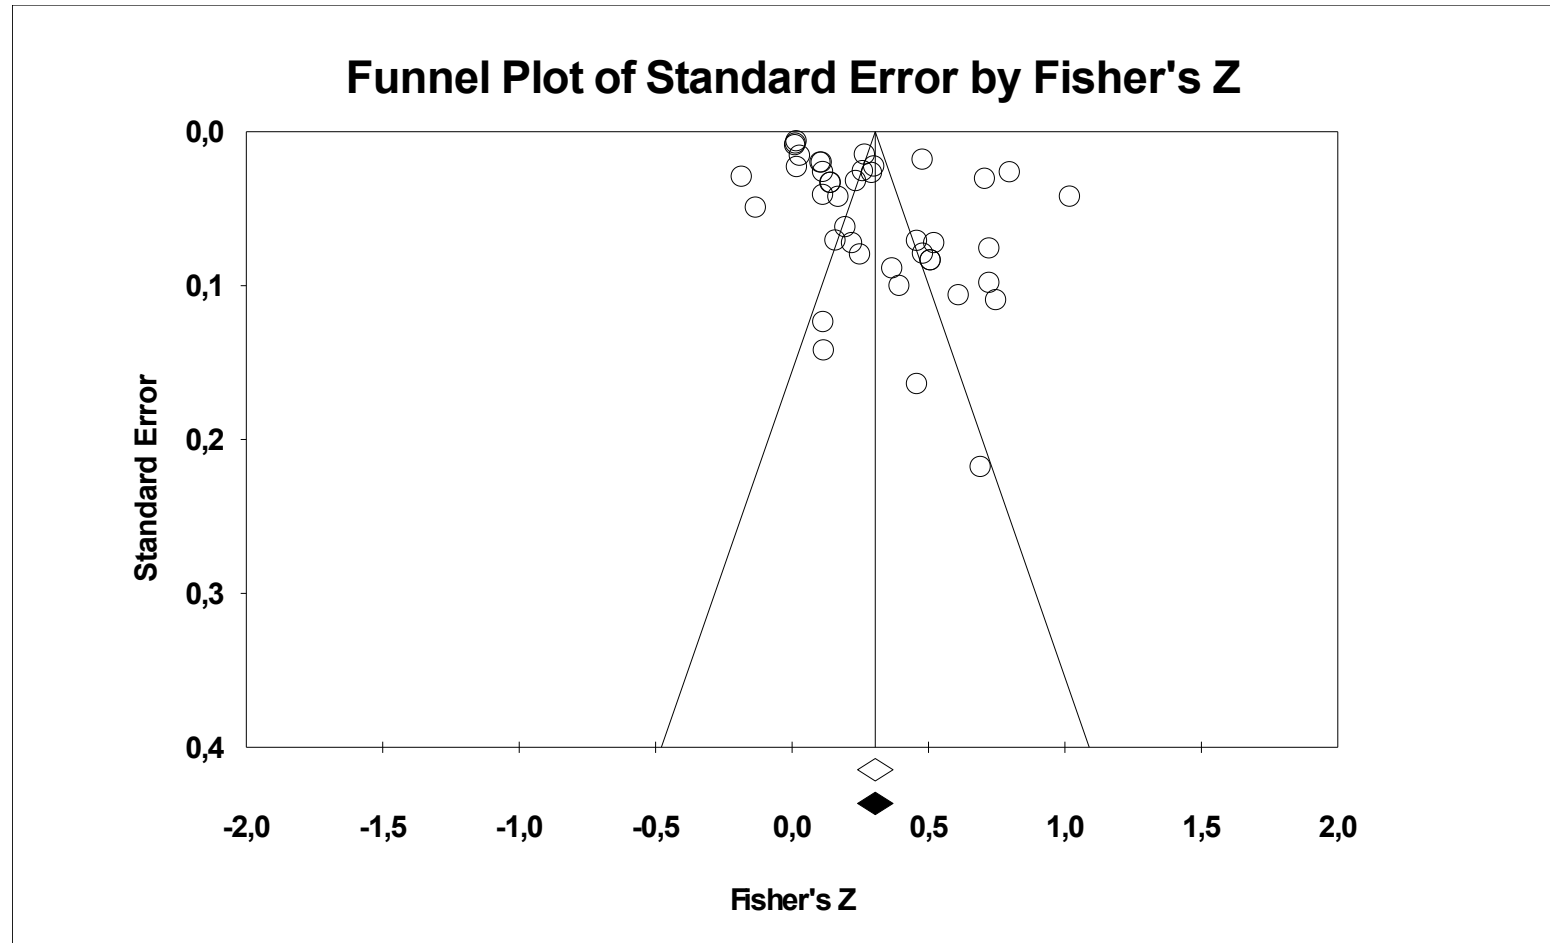

#### 4. Funnel plot: Analysis including behavioural outcomes

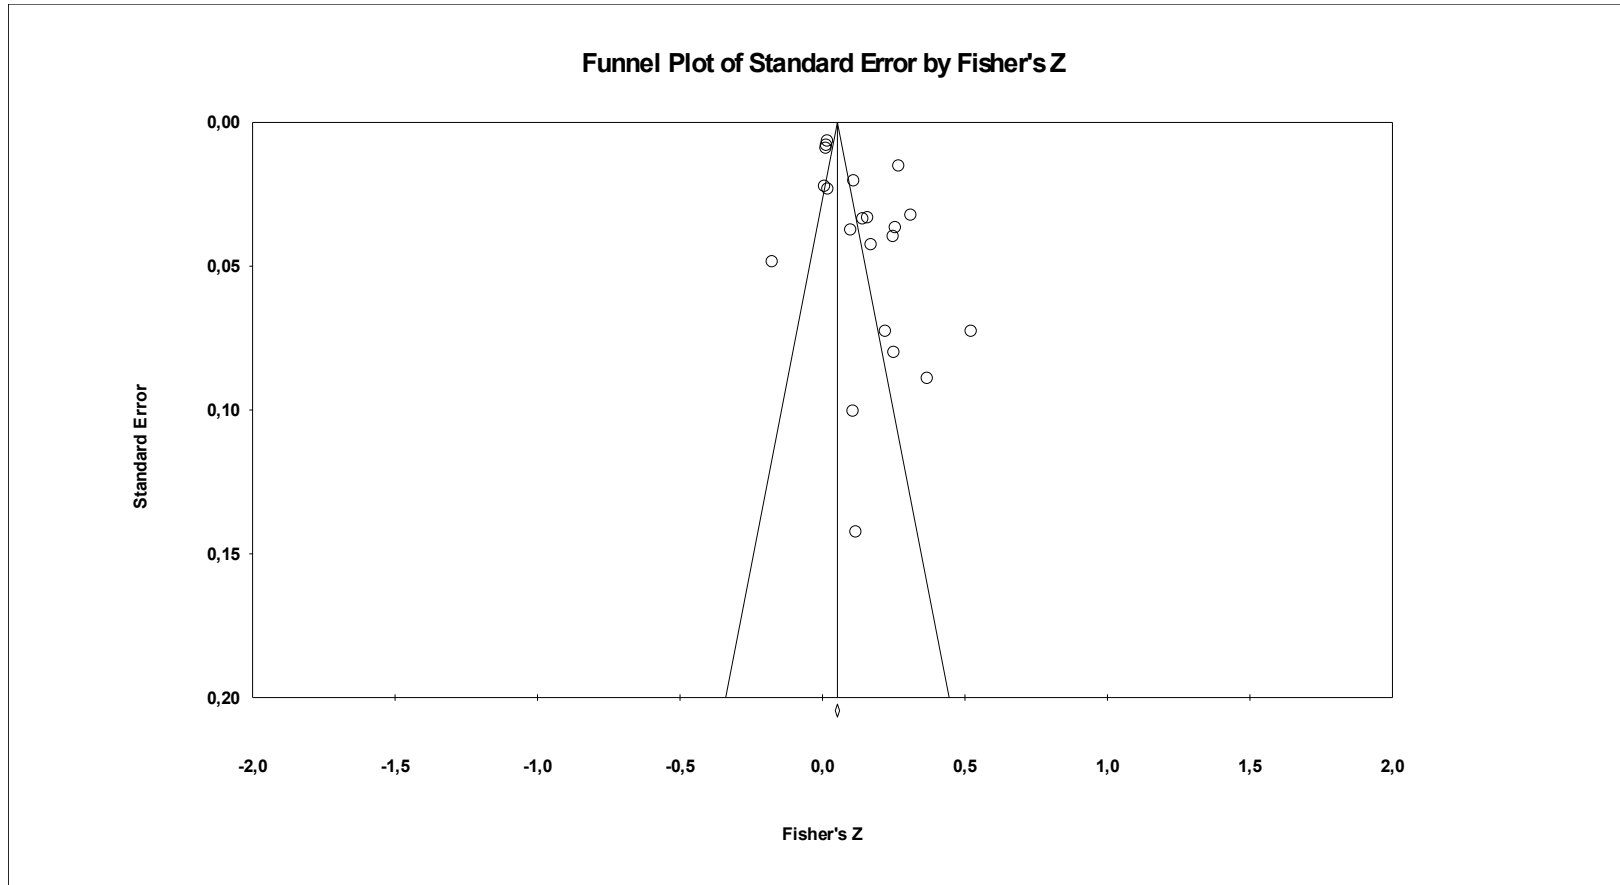

## 5. Funnel plot: Analysis including subjective experience as outcome

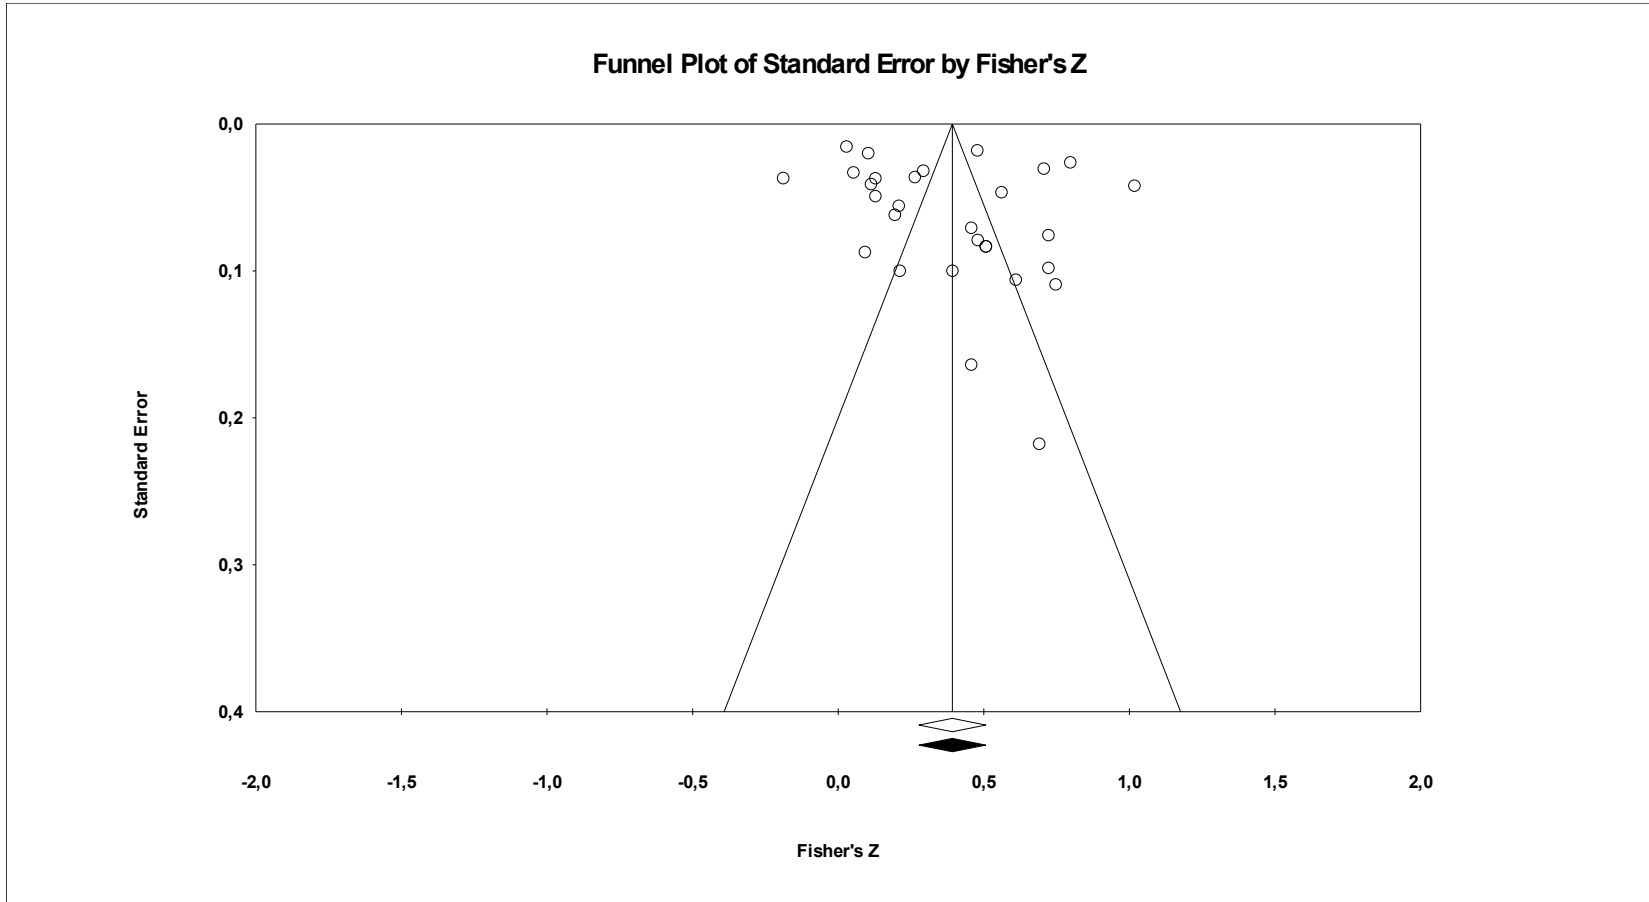

**6. Funnel plot: Analysis including patient satisfaction as outcome**

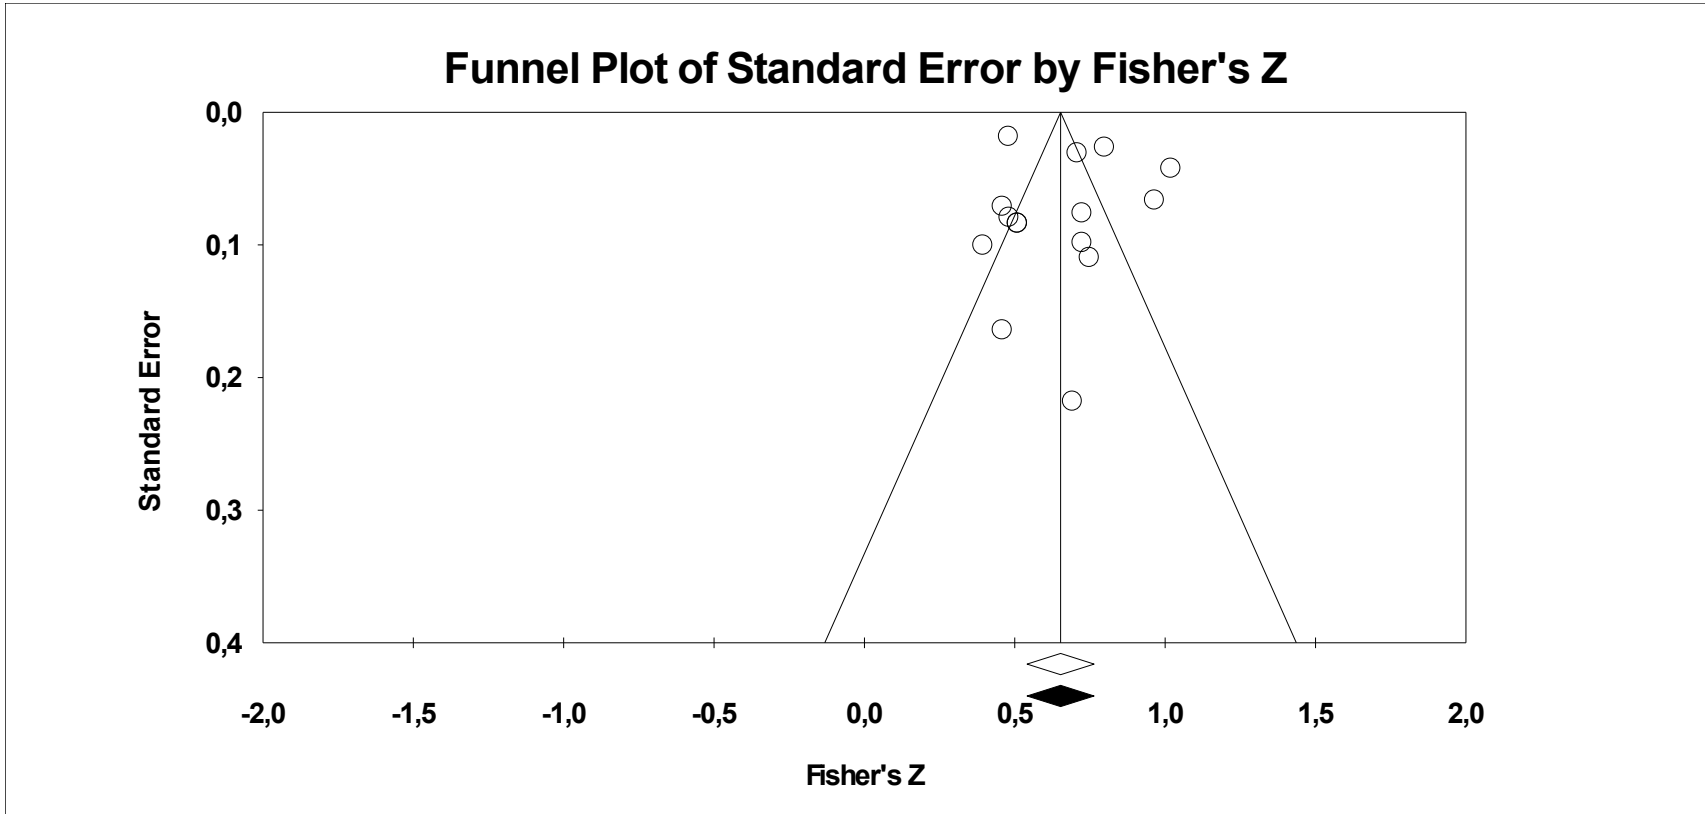

### 7. Funnel plot: Analysis including health-related quality of life as outcome

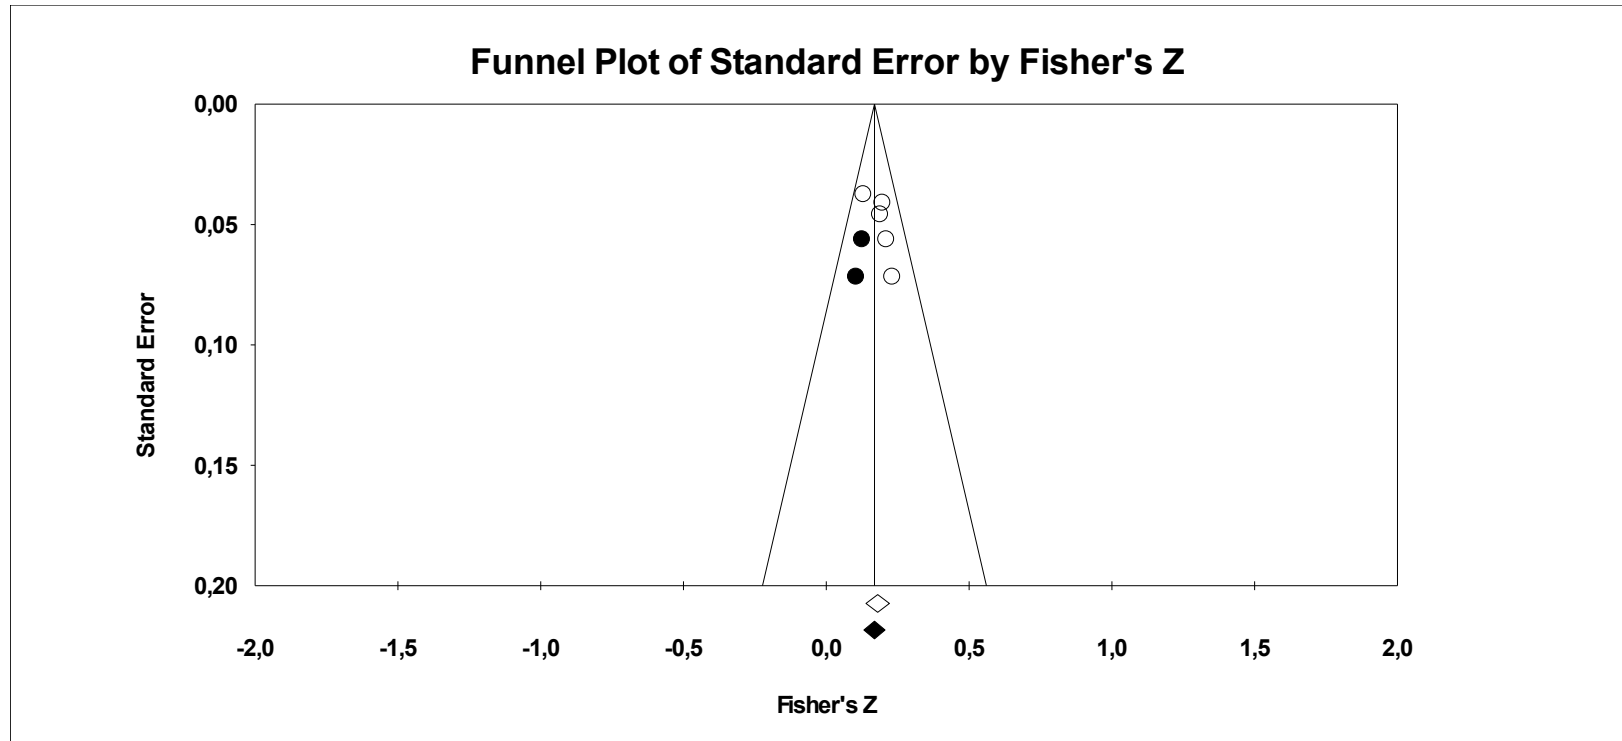

### 8. Funnel plot: Analysis including symptom-related outcomes

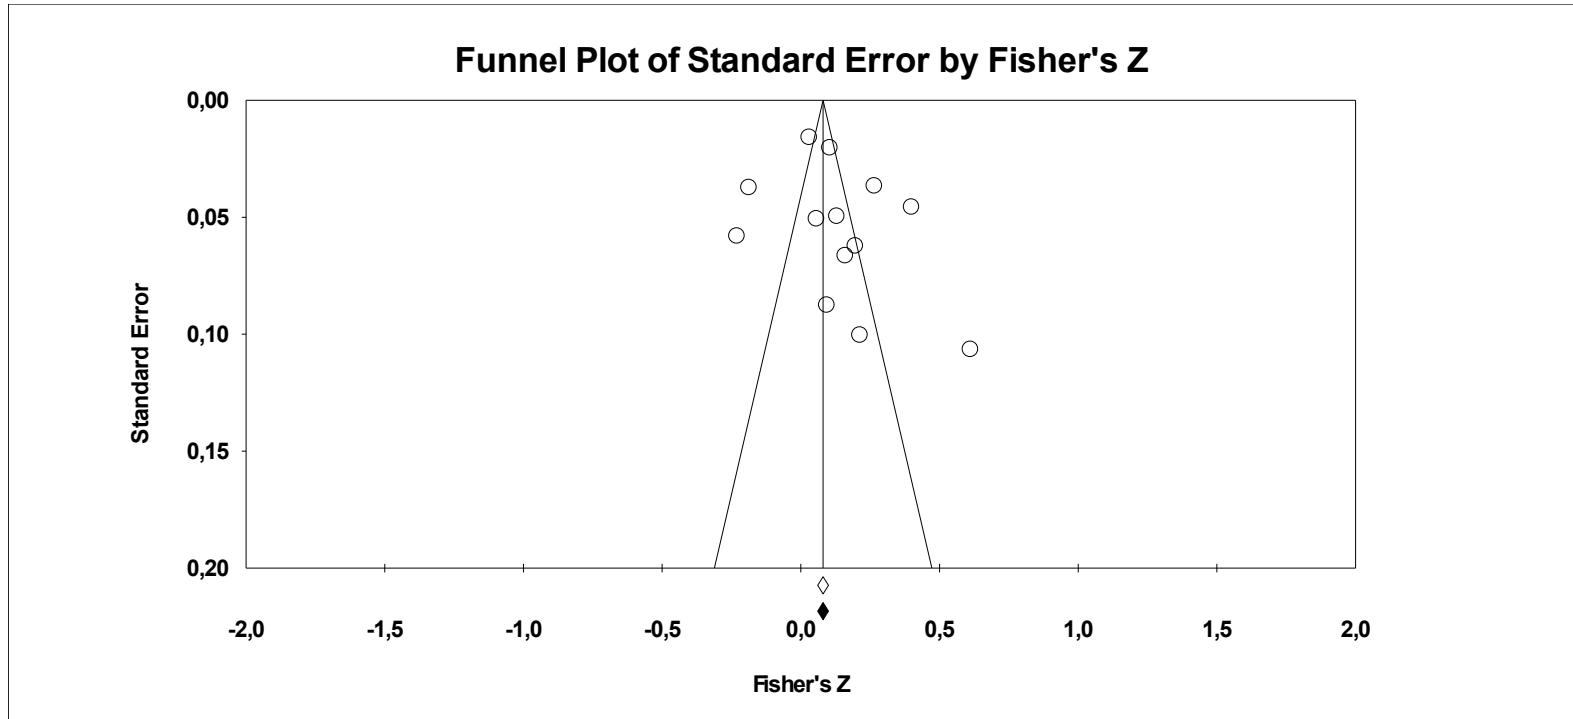

Supplement: pone.0170988.s003.pdf [file pone.0170988.s003.pdf]
