# Supplementary material for: Trust in the health care professional and health outcome: A meta-analysis
Source: PubMed Central journal article supplement (PMC5295692; doi:10.1371/journal.pone.0170988), 2017-02-07

## Supporting File S4. Meta regression.

1. Meta regression for duration of treatment (months) including all studies

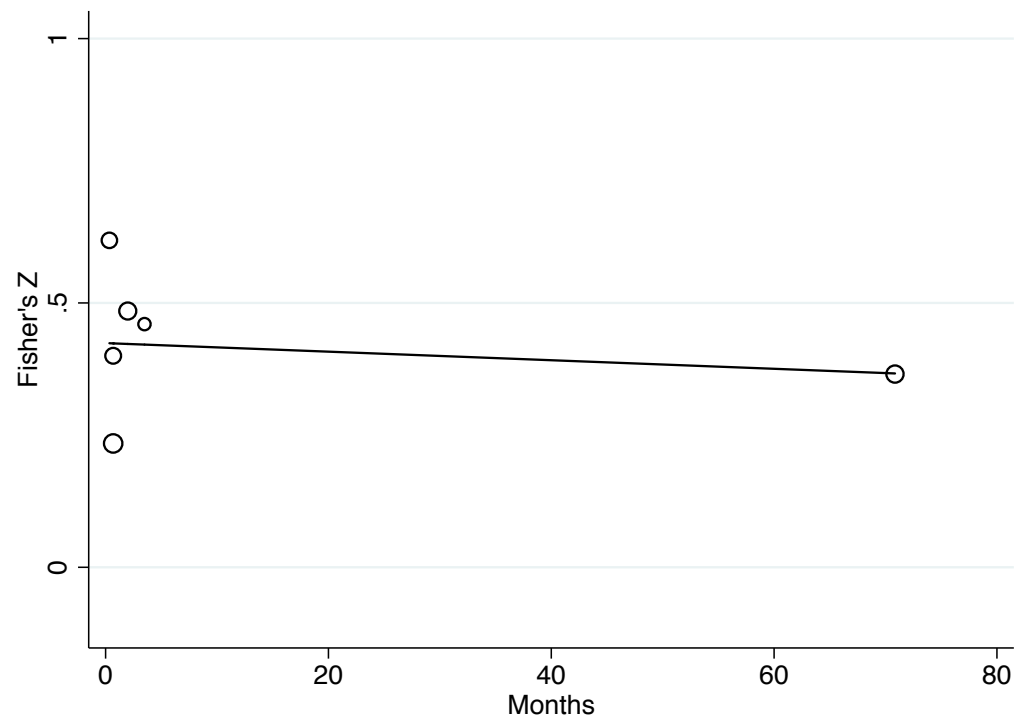

## 2. Meta regression for duration of treatment (months) excluding outlier study

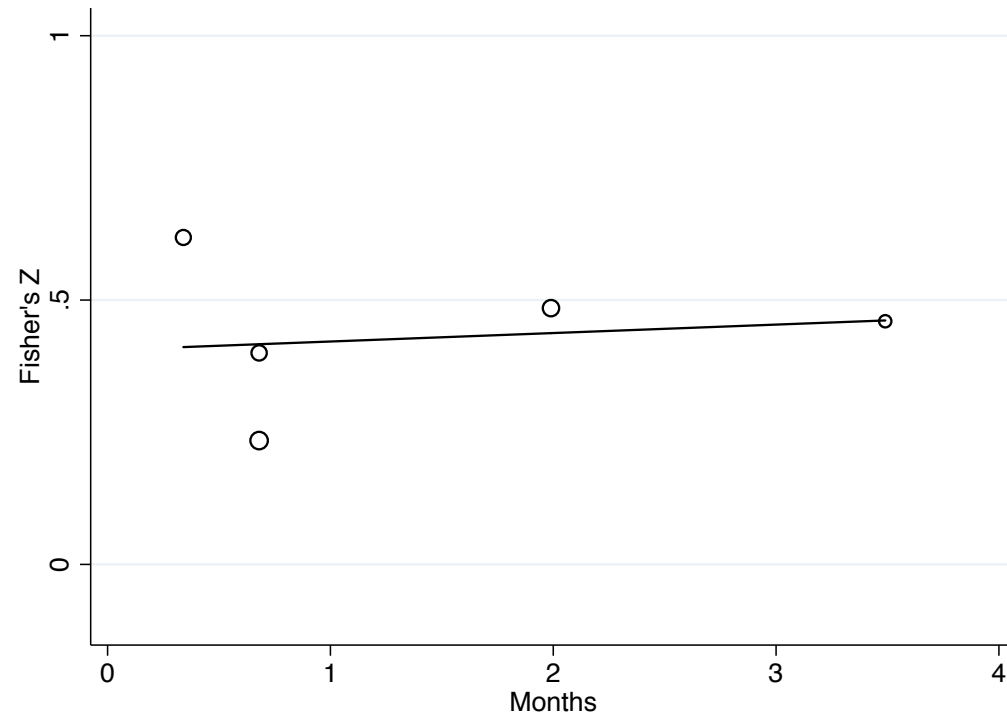

### 3. Meta regression for study quality including all studies

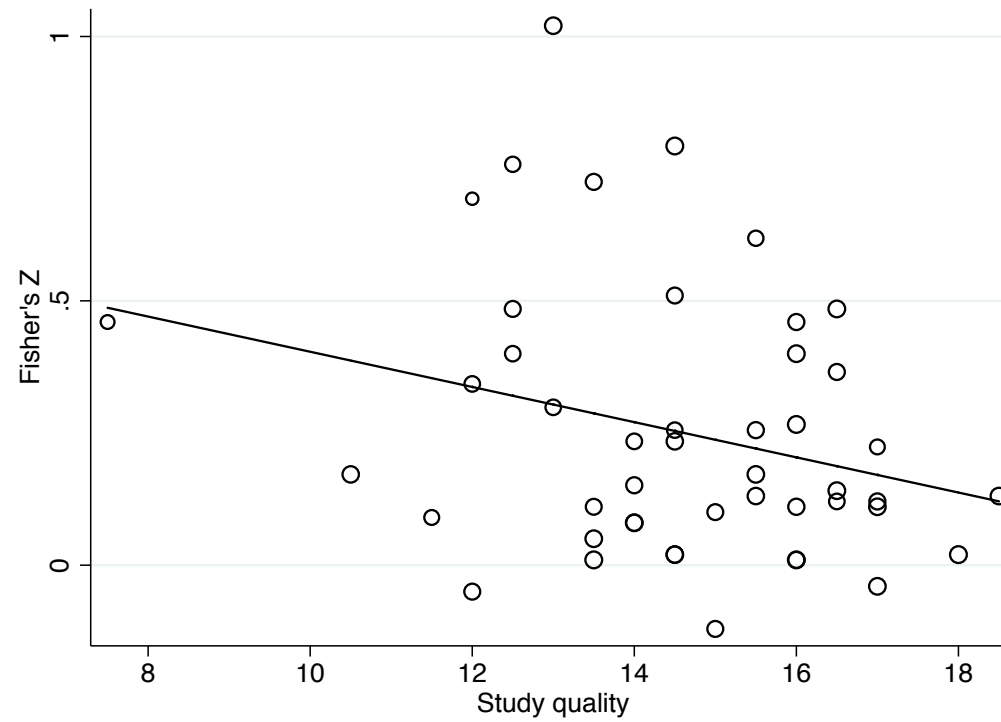

#### 4. Meta regression for study quality excluding outlier study

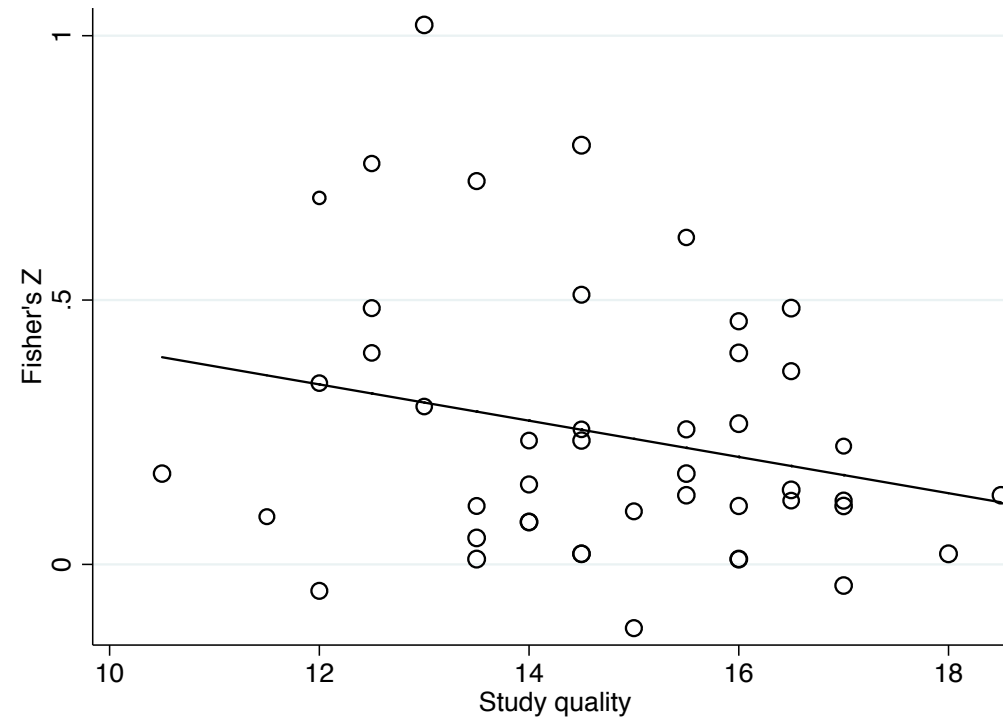

Supplement: pone.0170988.s004.pdf [file pone.0170988.s004.pdf]
