# Supplementary material for: Trust in the health care professional and health outcome: A meta-analysis
Source: PLoS One. 2017 Feb 7;12(2):e0170988. doi: 10.1371/journal.pone.0170988 (PMC5295692; doi:10.1371/journal.pone.0170988)
Supplement: S1 Table — (PDF) [file pone.0170988.s005.pdf]

**S1 Table.      Characteristics of Studies Included in the Meta-Analysis**

| <i>Author</i> | <i>Year</i> | <i>N</i>          | <i>Country</i> | <i>Disorder</i>                              | <i>Questionnaire</i> | <i>STROBE</i> | <i>Outcome Measure</i>                                                                                                                                                                                |
|---------------|-------------|-------------------|----------------|----------------------------------------------|----------------------|---------------|-------------------------------------------------------------------------------------------------------------------------------------------------------------------------------------------------------|
| Altice        | 2001        | 235               | NA             | HIV                                          | TiPS                 | 15.5          | Acceptance of antiretroviral therapy (ART)                                                                                                                                                            |
| Anderson      | 1990        | 177               | NA             | Diabetes                                     | TiPS                 | 12            | Fasting blood glucose level                                                                                                                                                                           |
| Anderson*     | 1990        | 177               | NA             | Diabetes                                     | TiPS                 | 12            | Fasting blood glucose level; patient satisfaction                                                                                                                                                     |
| Baker         | 2003        | 1068 <sup>a</sup> | NA             | -                                            | TiPS                 | 16.5          | General satisfaction,; satisfaction with professional care; satisfaction with depth of relationship; satisfaction with perceived length of consultation                                               |
| Balkrishnan   | 2003        | 2172              | NA             | Not specified                                | WFPTS                | 16            | Patient satisfaction with healthcare; physical health                                                                                                                                                 |
| Becker        | 2008        | 2224 <sup>a</sup> | NA             | Diabetes, Healthy, Elevated lipids           | TiPS                 | 16            | Exercise; diet                                                                                                                                                                                        |
| Benkert       | 2006        | 145               | NA             | -                                            | TiPS                 | 14.5          | Patient satisfaction                                                                                                                                                                                  |
| Biedrzycki    | 2011        | 498               | NA             | Cancer                                       | PTS                  | 17            | Symptom burden; hope; quality of life                                                                                                                                                                 |
| Blackstock    | 2012        | 187               | NA             | HIV                                          | WFPTS                | 16.5          | Adherence                                                                                                                                                                                             |
| Boothroyd     | 2008        | 3600              | NA             | -                                            | TiPS                 | 14.5          | General satisfaction                                                                                                                                                                                  |
| Bosworth      | 2004        | 1112              | NA             | Diabetes, Hypertension, Heart disease        | TiPS                 | 16.5          | Willingness to undergo surgery                                                                                                                                                                        |
| Burge         | 2009        | 68                | NA             | Total knee athroplasty                       | PONC                 | 11.5          | Pain measured by visual analogue scale, functional outcome of the joint athroplasty                                                                                                                   |
| Cooper        | 2009        | 250               | E              | Barrett's Oesophagus                         | TiPS                 | 15            | Anxiety; depression; role limitation because of physical problems; role limitation because of emotional problems general perception on health; energy and vitality; social functioning; mental health |
| Distefano     | 1981        | 40                | NA             | Diagnosis of psychosis, personality disorder | ITS                  | 7.5           | Patient satisfaction                                                                                                                                                                                  |
| Durant        | 2010        | 2843              | NA             | Diabetes, Hypertension, Renal disease        | PCAS                 | 16            | Blood pressure control                                                                                                                                                                                |
| Farin         | 2010        | 742               | E              | Heart disease                                | TiPS                 | 14.5          | Mental health; emotional functioning; social functioning                                                                                                                                              |
| Fernandez     | 2012        | 600               | NA             | Diabetes                                     | CAHPS-CC             | 17            | Glycosylated hemoglobin, blood lipid cholesterol, systolic blood pressure control                                                                                                                     |

| <i>Author</i>   | <i>Year</i> | <i>N</i>         | <i>Country</i> | <i>Disorder</i>                                                  | <i>Questionnaire</i> | <i>STROBE</i> | <i>Outcome Measure</i>                                                                                                                         |
|-----------------|-------------|------------------|----------------|------------------------------------------------------------------|----------------------|---------------|------------------------------------------------------------------------------------------------------------------------------------------------|
| Freburger       | 2003        | 713 <sup>a</sup> | NA             | Rheumatic disease                                                | TiPS                 | 13.5          | Diagnosis of fibromyalgia, osteoarthritis, rheumatoid arthritis                                                                                |
| Garcia-Gonzalez | 2009        | 200              | NA             | Rheumatic disease                                                | TiPS                 | 16            | Patient satisfaction with clinical visits                                                                                                      |
| Graham          | 2013        | 188              | NA             | HIV                                                              | WFPTS                | 15            | Early diagnosis of HIV: CD4 cell counts                                                                                                        |
| Gregg           | 2010        | 11 928           | NA             | Diabetes                                                         | PCAS                 | 18            | Probability of missing preventative care                                                                                                       |
| Guipponi        | 2009        | 161              | E              | Diagnosis of Affective disorder, Schizophrenia, Addiction, Other | ICS                  | 12.5          | Patient satisfaction                                                                                                                           |
| Guipponi*       | 2009        | 161              | E              | Diagnosis of Affective disorder, Schizophrenia, Addiction, Other | ICS                  | 12.5          | Patient satisfaction                                                                                                                           |
| Hillen          | 2013        | 175 <sup>a</sup> | Au             | Cancer                                                           | TiOS                 | 13.5          | Satisfaction with the oncologist                                                                                                               |
| Hunfeld         | 1999        | 24 <sup>a</sup>  | E              | Fetal Anomaly (pregnant women)                                   | CPQ                  | 12            | Satisfaction with prenatal consultation                                                                                                        |
| Kao             | 2012        | 192 <sup>a</sup> | A              | Diagnosis of Mood disorder, Schizophrenia                        | ICS                  | 14            | Diagnosis schizophrenia, mood disorder; adherence                                                                                              |
| Kerse           | 2004        | 490              | Au             | -                                                                | TiPS                 | 14.5          | Medication compliance                                                                                                                          |
| Lee             | 2009        | 480 <sup>a</sup> | A              | Diabetes                                                         | TiPS                 | 18.5          | Health-related quality of Life; BMI, glycosylated hemoglobin, blood lipid control; complications self-efficacy; outcome expectation; adherence |
| Mainous         | 2004        | 119              | NA             | Cancer                                                           | TiPS                 | 14            | Earlier detection of cancer: Stage of cancer                                                                                                   |
| Mancuso         | 2010        | 102              | NA             | Diabetes                                                         | HCR                  | 14.5          | Glycosylated hemoglobin con-centration; self-care activities; depression                                                                       |
| Moffet          | 2011        | 186 306          | NA             | Diabetes                                                         | TiPS                 | 13.5          | Lab attendance for control of glycosolated haemoglobin, blood lipid, serum creatinine, urinary albumin                                         |
| Ngyuen          | 2009        | 235 <sup>a</sup> | NA             | Inflammatory Bowel Disease                                       | TiPS                 | 16            | Self-reported non adherence, overall adherence, medication adherence                                                                           |
| Ostertag        | 2013        | 374              | NA             | HIV, Other                                                       | TiPS                 | 10.5          | Diagnosis of HIV; depression; health care utilization, self-efficacy                                                                           |

| <i>Author</i> | <i>Year</i> | <i>N</i>         | <i>Country</i> | <i>Disorder</i>        | <i>Questionnaire</i>  | <i>STROBE</i> | <i>Outcome Measure</i>                                                                                                                  |
|---------------|-------------|------------------|----------------|------------------------|-----------------------|---------------|-----------------------------------------------------------------------------------------------------------------------------------------|
| Peters        | 2007        | 145              | -              | Hypertension           | TiPS                  | 13.5          | Diastolic and systolic blood pressure level; satisfaction with care                                                                     |
| Piette        | 2005        | 912 <sup>a</sup> | NA             | Diabetes               | PCAS                  | 14            | Non-cost related underuse; depressive symptoms; comorbidities                                                                           |
| Platonova     | 2008        | 554              | NA             | -                      | TiPS                  | 13            | Patient satisfaction with physician service                                                                                             |
| Rosman        | 2012        | 162              | -              | -                      | TEPQ                  | 16.5          | Non-adherence                                                                                                                           |
| Sizer         | 2008        | 86 <sup>a</sup>  | -              | -                      | TiPS                  | 12.5          | Patient satisfaction                                                                                                                    |
| Slean         | 2012        | 502 <sup>a</sup> | -              | Diabetes               | CAHPS-CC <sup>b</sup> | 17            | Emotional and mental distress associated with management of diabetes                                                                    |
| Spain         | 2008        | 1054             | NA             | Cancer                 | PCAS <sup>b</sup>     | 14.5          | Personal responsibility for prostate care; cancer is diagnosed symptomatically (later diagnosis)                                        |
| Taha          | 2011        | 347              | NA             | Cancer, Healthy        | TiPS                  | 14            | Depressive symptoms; medical decision regret                                                                                            |
| Thüm          | 2012        | 130              | E              | Severely injured       | CPQ                   | 15.5          | Experienced support by the physician                                                                                                    |
| Trachtenberg  | 2005        | 2172             | NA             | -                      | WFPTSb                | 15.5          | Adherence                                                                                                                               |
| Tucker        | 2011        | 229              | NA             | Diabetes, Hypertension | TiPS                  | 13            | Patients interpersonal control; patient satisfaction; physical stress; health promoting lifestyle; diet adherence; medication adherence |
| Vina          | 2012        | 182 <sup>a</sup> | NA             | Lupus erythematoses    | WFPTS                 | 16            | Willingness to take immunosuppressive medication                                                                                        |
| Vissman       | 2013        | 91               | NA             | HIV                    | WFPTS                 | 17            | Adherence                                                                                                                               |
| Waters        | 2010        | 1572             | NA             | Cancer                 | TiPS                  | 15.5          | Perceived risk of recurrence                                                                                                            |

*Note.* Study Quality was assessed using the STROBE Statement-checklist of items that should be included in reports of observational studies: A value of < 10 is considered as poor study quality; N=total sample size of the study; NA=North America; E=Europe; A=Asia; Au=Australia; -=not specified; Other=a group of participants is not specified with regard to disorder; TiPS=Trust in Physician Scale; WFPTS=Wake Forest Trust Scale; PCAS=Trust Scale of the Primary Care Assessment Survey; CAHPS-CC=Trust Scale of Consumer Assessment of Healthcare Providers and Systems Cultural Competence; ICS= Trust Scale of the Illness Concept Scale; TiOS=Trust in Oncologist Scale; CPQ=Trust Scale of the Cologne Patient Questionnaire; HCR=The Health Care Relationship Trust Scale; PTS=Patient Trust Scale; ITS=Interpersonal Trust Scale; TEPQ=Trust in the Emergency Department Questionnaire; PONC=Patient's Opinion of Nursing Care; BMI=Body mass index.

\*Described as a second independent study population in article, therefore separately included in analysis.

<sup>a</sup> Descriptive N was used, since total N was missing.
